1 **The CONDOR pipeline for simultaneous knockdown of multiple genes identifies**  
2 **RBBP-5 as a germ cell reprogramming barrier in *C. elegans***

3

4 Marlon Kazmierczak<sup>1,2</sup>, Carlota Farré i Díaz<sup>1,2</sup>, Andreas Ofenbauer<sup>1,2</sup>, Baris Tursun<sup>1,2#</sup>

5

6 **Affiliations:**

7 <sup>1</sup>Berlin Institute of Medical Systems Biology,

8 <sup>2</sup>Max Delbrück Center for Molecular Medicine in the Helmholtz Association, 13125 Berlin,  
9 Germany

10

11 **#Correspondence to:**

12 baris.tursun@mdc-berlin.de (BT)

13

14 **Running Title:** CONDOR identifies RBBP-5 as a germ cell reprogramming barrier

15

16 **Keywords:** RNA interference, Double RNAi, Genetic Screen, Conjugation, Reprogramming,  
17 Epigenetics, *C. elegans*

18

19 **ABSTRACT**

20 Multiple gene activities control complex biological processes such as cell fate  
21 specification during development and cellular reprogramming. Investigating the manifold gene  
22 functions in biological systems requires also simultaneous depletion of two or more gene  
23 activities. RNA interference-mediated knockdown (RNAi) is commonly used in *C. elegans* to  
24 assess essential genes, which otherwise lead to lethality or developmental arrest upon full  
25 knockout. RNAi application is straightforward by feeding worms with RNAi plasmid-containing  
26 bacteria. However, the general approach of mixing bacterial RNAi clones to deplete two genes  
27 simultaneously often yields poor results. To address this issue, we developed a bacterial  
28 conjugation-mediated double RNAi technique 'CONDOR'. It allows combining RNAi bacteria  
29 for robust double RNAi with high-throughput. To demonstrate the power of CONDOR for large  
30 scale double RNAi screens we conjugated RNAi against the histone chaperone gene *lin-53*  
31 with more than 700 other chromatin factor genes. Thereby, we identified the Set1/MLL  
32 methyltransferase complex member RBBP-5 as a novel germ cell reprogramming barrier. Our  
33 findings demonstrate that CONDOR increases efficiency and versatility of RNAi screens to  
34 examine interconnected biological processes in *C. elegans* with high-throughput.

35

## 36 INTRODUCTION

37 Most biological processes such as development, cell fate specification, aging, and  
38 behavior are controlled by the activity of multiple genes. One approach to investigate the  
39 implication of genes in regulating such complex processes is their inactivation to assess of  
40 related perturbation phenotypes (Boutros and Ahringer, 2008).

41 Reverse genetics by RNAi is an essential tool to at least partially inactivate genes in the  
42 nematode *C. elegans*, which has been used as a powerful model organism to reveal highly  
43 conserved molecular mechanisms and gene regulatory pathways (Dudley and Goldstein,  
44 2005; Markaki and Tavernarakis, 2020). To perform RNAi in *C. elegans*, animals are fed  
45 individual *E. coli* bacterial strains producing dsRNA against only one specific gene (Conte et  
46 al., 2015; Kamath et al., 2003) (Fig. 1A). RNAi causes a partial knockdown allowing the  
47 investigation of genes, which would cause early developmental arrest, sterility, or even  
48 lethality when fully depleted. This RNAi feature is an important benefit compared to genetic  
49 screens based on mutagenesis or gene editing. Mutagenizing chemical compounds or  
50 CRISPR/Cas9 often lead to a full gene knockout, and hence, reduce the possibility to study  
51 essential genes during biological processes post-embryonically or in adult animals (Boutros  
52 and Ahringer, 2008).

53 Simultaneous RNAi-mediated knockdown of two genes in *C. elegans* is generally  
54 applied by mixing two bacterial strains that contains specific dsRNA-producing plasmids  
55 targeting an individual gene (Kamath et al., 2001) (Fig. 1B). However, this approach is not  
56 reliable and often yields inefficient knockdown of both genes (Gouda et al., 2010). This  
57 inefficiency can be overcome by generating a single plasmid producing both dsRNAs against  
58 the targeted genes (Gouda et al., 2010). While ‘stitching’ target genes together on one RNAi  
59 plasmid mediates robust double RNAi, it is not feasible for large scale screens, as it would  
60 require high-throughput plasmid cloning.

61 In order to reconcile double RNAi robustness with high-throughput screening, we  
62 developed a CONjugation-mediated Double RNAi technique, which we term ‘CONDOR’.  
63 CONDOR generates double RNAi bacteria clones in high-throughput and significantly reduces  
64 the amount of time and reagents compared to plasmid cloning. At the same time CONDOR  
65 provides simultaneous knockdown of a large set of two-gene combinations in a robust manner.

66 To examine the efficiency of CONDOR for large-scale screening, we investigated the  
67 knockdown of around 700 chromatin factors in combination with RNAi against the histone  
68 chaperone LIN-53 in *C. elegans*. LIN-53 was previously identified to prevent in conjunction  
69 with the chromatin silencer PRC2 transcription factor-induced (TF) conversion of germ cells  
70 into neuron-like cells (Patel et al., 2012; Seelk et al., 2016; Tursun et al., 2011). RNAi against  
71 *lin-53* alone allows efficient germ cell conversion to glutamatergic neurons (termed ASE) by  
72 the TF CHE-1. In contrast, only limited conversion to GABAergic motor neurons by the Pitx-

73 type homeodomain TF UNC-30 could be observed in LIN-53-depleted animals. We  
74 hypothesized that depletion of additional chromatin regulators together with *lin-53* may  
75 increase germ cell reprogramming to GABAergic neurons. Indeed, our CONDOR screen  
76 revealed that co-depletion of the Set1/MLL methyltransferase complex member RBBP-5  
77 together with LIN-53 significantly increased germ cell reprogramming to GABAergic neurons.

78 Chromatin factors have been identified in *C. elegans* and mammals as cellular  
79 reprogramming barriers and possible interplay of epigenetic mechanisms remains to be an  
80 important research aspect of safeguarding cell fates. CONDOR provides the multiplexed  
81 interrogation of combinatorial gene knockdowns for investigating such aspects, but can be  
82 also applied in the context of other biological phenomena. Genes may act in distinct or similar  
83 pathways with identical or converging physiological functions. Hence it is important to study  
84 their relationship in order to better understand underlying mechanisms of biological processes  
85 such as development and cell fate specification, which may also be relevant for addressing  
86 open questions in biomedical research.

87

## 88 **RESULTS**

### 89 ***Double RNAi by mixing bacterial strains is inefficient***

90 In order to assess the degree of double RNAi robustness we generated the strain  
91 BAT1616, which expresses red fluorescent protein (RFP) as well as green fluorescent protein  
92 (GFP) in muscles using the *myo-3* promoter (Fig. 1C). For easy assessment of fluorescence  
93 signal intensities both fluorescent proteins are localized to the nuclei of all 95 body wall  
94 muscles (Fig. 1C-D). To simultaneously deplete RFP and GFP signals in the muscle nuclei  
95 we applied a 1:1 mix of RNAi bacterial clones, based the 'Ahringer' RNAi library *HT115 E. coli*  
96 strains, each containing RNAi plasmids against *RFP* and *GFP* (Fig. 1C-F) (Supp.Fig. 1).  
97 Around 50% of muscle nuclei lost RFP and GFP signals in F1 RNAi animals (Fig. 1C-F). In  
98 contrast, feeding *HTT115 E. coli* with GFP or RFP RNAi-plasmids individually reduced GFP  
99 and RFP signals more efficiently in approximately 75% of muscle nuclei, respectively (Fig.  
100 1F). This outcome confirmed that mixing RNAi bacteria attenuates knockdown efficiency of  
101 individual genes as previously reported (Gouda et al., 2010).

102 To solve the issue of decreased RNAi efficiency upon mixing different RNAi bacteria,  
103 we assumed that combining two different RNAi plasmids in the same cell may increase  
104 robustness and efficiency of double RNAi (Fig. 1G).

105

### 106 ***Bacterial conjugation to combine RNAi plasmids***

107 Generating hundreds or thousands of new plasmids as described previously (Gouda et  
108 al., 2010) to combine a target gene of interest with a set of other targets is not feasible for  
109 large-scale double RNAi screens.

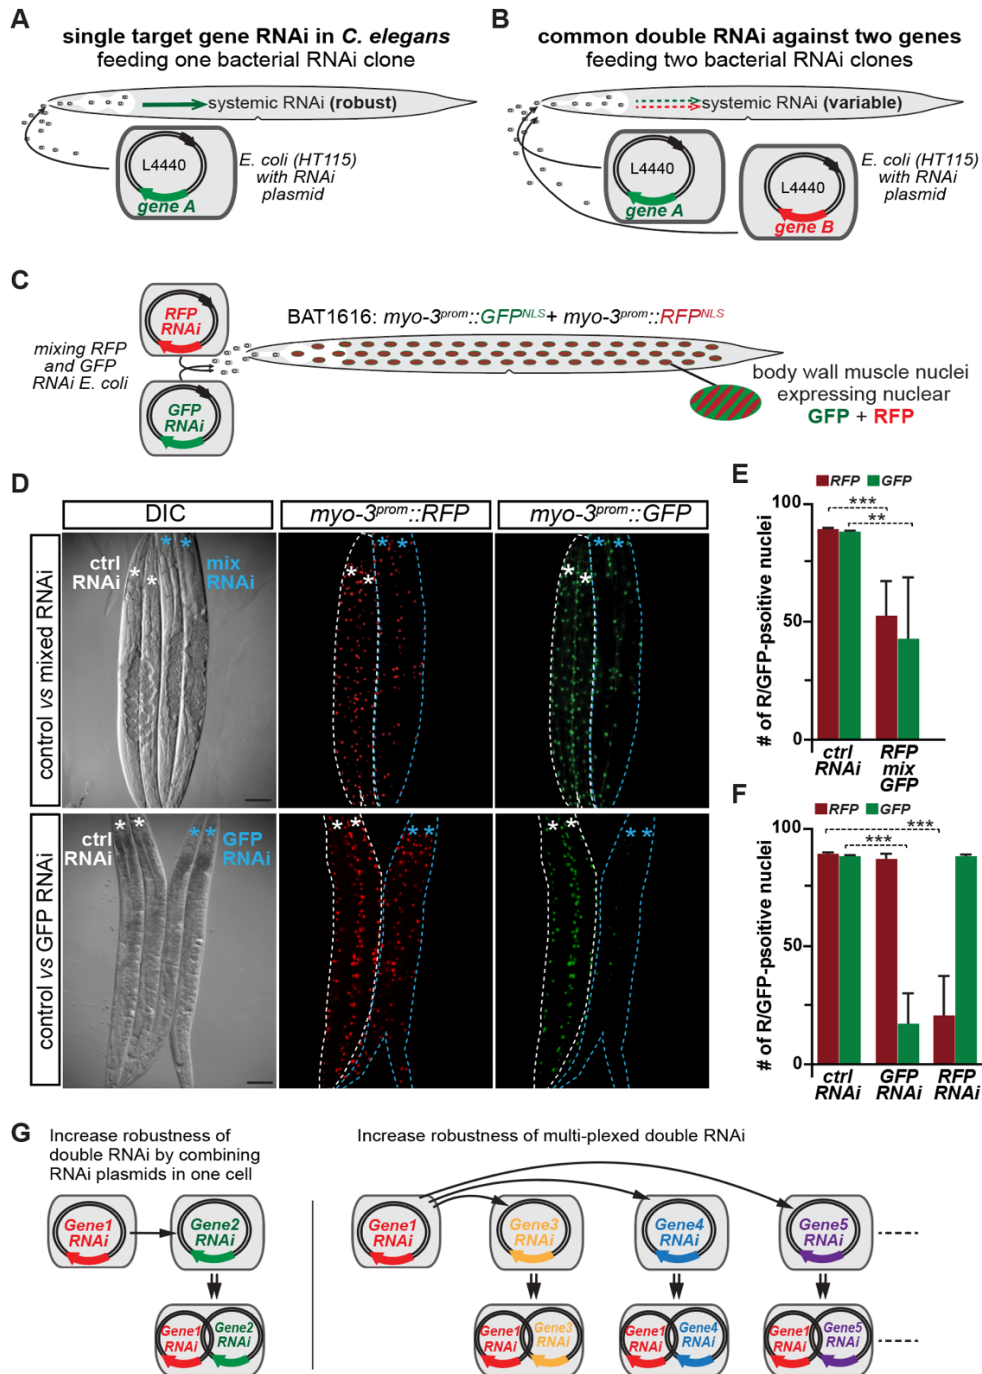

**Figure 1: Double RNAi in *C. elegans* by feeding mixed RNAi bacteria.** (A) RNAi in *C. elegans* is straightforward by feeding dsRNA-producing *E. coli* (*HT115* strain). dsRNA against the target gene is produced from the L4440 RNAi plasmid. (B) Double RNAi to knockdown two genes simultaneously by mixing two RNAi bacteria clones. (C) Illustration of transgenic BAT1616 worms expressing RFP and GFP in nuclei of muscles. Using the *myo-3* promoter 95 body wall muscle nuclei in hermaphrodites are labelled. (D) Representative pictures of DIC and fluorescent signals of BAT1616 fed with RNAi bacteria against RFP and GFP either mixed or individually. Asterisks label pharynx of simultaneously imaged animals. Scale bars are 20  $\mu$ m. (E and F) Quantification of muscle nuclei number with depleted GFP or RFP signals. Statistics: unpaired t-test; \*\*\* $p < 0,0001$ ; \*\* $p < 0,001$ .  $n = 200$ . Error bars represent SEM (G) Illustration of proposition to increase robustness of double RNAi by combining two RNAi plasmids in bacterial cells.

111 In order to develop a pipeline that allows combining RNAi plasmids with high-throughput,  
112 which provides robust double RNAi knockdowns, we sought for a method that consumes low  
113 amount of time and reagents. One such approach is bacterial conjugation, which allows the  
114 transfer of plasmids with an *origin of transfer (oriT)* among bacterial cells. Competence for  
115 bacterial conjugation requires presence of the fertility factor, also termed F-plasmid, which  
116 contains several genes of the *tra* locus for the formation of a pilus appendage. Bacteria with  
117 the F-plasmid are denoted as F<sup>+</sup> (donor) and connect via the pilus to F<sup>-</sup> bacteria (recipient) to  
118 transfer plasmids or other genetic material containing an *oriT* to the recipient (Supp.Fig. 2).

119 To adopt bacterial conjugation for combining RNAi plasmids, we made the F-plasmid  
120 *pRK24* (Meyer et al., 1979) and the RNAi plasmid *L4440* to be compatible with each other.  
121 We first replaced the Ampicillin resistance (AmpR) of *pRK24* with Kanamycin resistance  
122 (KanR) because *L4440* used in the standard 'Ahringer' *C. elegans* RNAi library (Kamath et al.,  
123 2003) already carries AmpR. To exchange AmpR with KanR we used recombineering, as  
124 previously described, due to the extensive size of *pRK24* (Fig. 2A) (Tursun et al., 2009). The  
125 generation of a selectable 'donor' RNAi plasmid, which can be transferred by conjugation,  
126 needed the addition of the *oriT* and replacement of AmpR with Chloramphenicol (CamR)  
127 resistance. This allows selection for presence of the transferred RNAi plasmid together with  
128 the resident AmpR-containing *L4440* RNAi plasmid after conjugation. We termed the newly  
129 generated donor plasmid '*LoriT*', which is basically *L4440* carrying *oriT* and CamR instead  
130 AmpR (Fig. 2B). Additionally, we figured that maintaining a large episome such as the F-  
131 plasmid requires stable conditions in bacteria - optimally preventing recombination events.  
132 Therefore, we used the *E. coli* strain *EPI300*, which is deficient of recombinases and has  
133 proven to maintain large fosmids in a stable manner (Fig. 2C) (Tursun et al., 2009). After  
134 cloning the target gene into *LoriT*, it is transformed to F<sup>+</sup> *EPI300* bacteria (contain *pRK24*-  
135 *Kan*). This creates the donor strain that is ready to be conjugated with the receiving 'Ahringer'  
136 RNAi bacteria (in *HT115 E.coli* strain) for combining the target gene of interest with any other  
137 target gene for double RNAi (Fig. 2C).

138 Next, we tested which conjugation procedure yields the most efficient transfer of the  
139 target gene-containing *LoriT* (Fig. 2D, Supp.Fig. 3A-I). By analyzing a number of variations  
140 including antibiotics at different steps and performing conjugation in liquid versus on solid  
141 media we determined the most efficient procedure (Supp.Fig. 3A-I). Combining a 5:1 ratio of  
142 donor : recipient bacterial culture on solid LB agar for 1h with subsequent selection (Cam /  
143 Amp in liquid for 1h) yielded 100% conjugation efficiency (Fig. 2D, Supp.Fig. 3A-I).

144 Overall, our adaption of the bacterial conjugation system to combine RNAi plasmids in  
145 bacteria is robust and straightforward to generate a large set of bacterial cells simultaneously  
146 producing dsRNA against two target genes. We termed our new technique CONDOR, which  
147 stands for CONjugation-mediated Double RNAi.

148

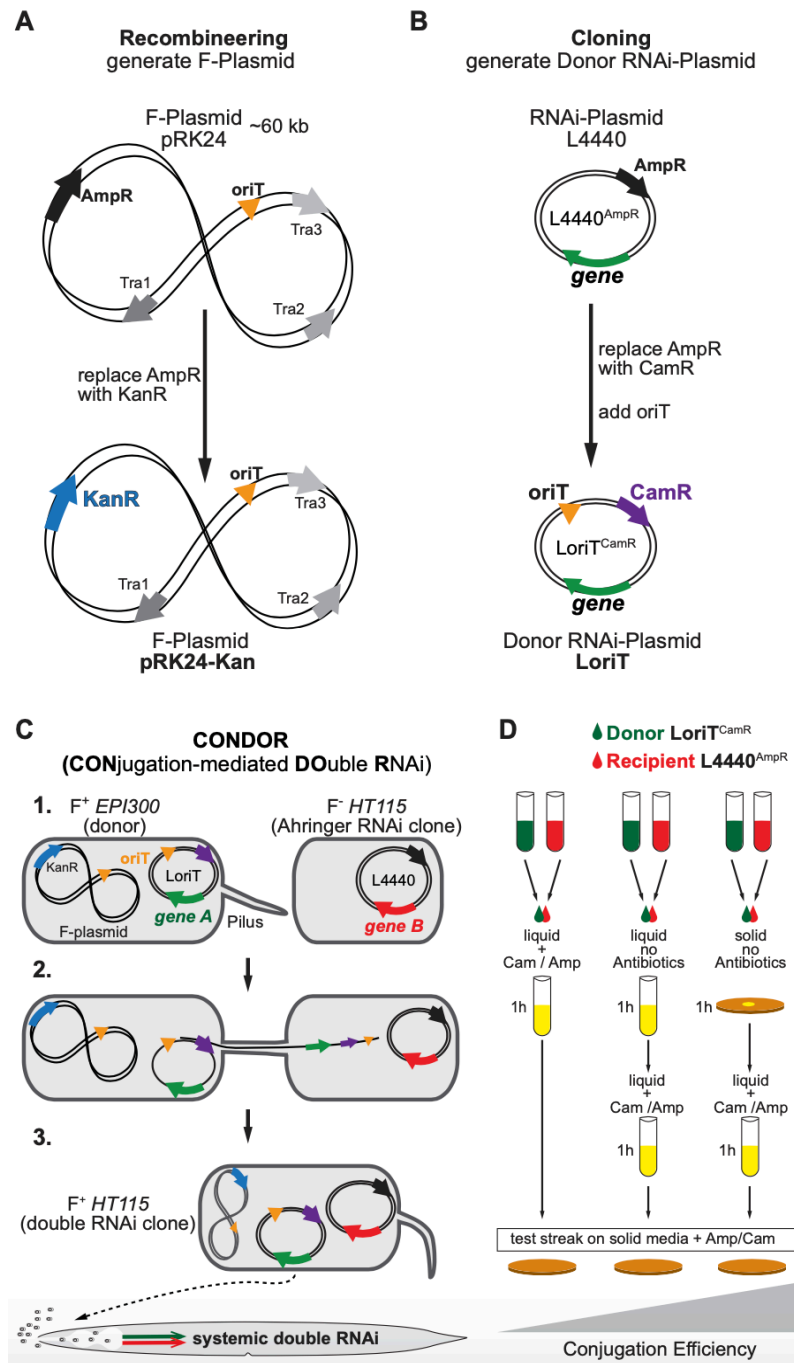

**Figure 2: Creating a double RNAi system by bacterial conjugation.** (A) The F-plasmid (fertility factor) encodes for components of the conjugation machinery to transfer *oriT*-containing genetic material. Recombineering was used to replace Ampicillin resistance (AmpR) with Kanamycin resistance (KanR) to allow combination with RNAi plasmids. (B) *LoriT* plasmid: we equipped the L4440 RNAi plasmid (used for clones of the Ahringer RNAi library) with *oriT* and exchanged AmpR with Chloramphenicol resistance (CamR). (C) pRK24-KanR-containing EPI300 *E. coli* are  $F^+$  and can conjugate with HT115 RNAi bacteria clones of the Ahringer RNAi library, which are  $F^-$ . Conjugated bacteria are selected based on CamR / AmpR. (D) Different conjugation procedures were evaluated to find the most efficient transfer of *LoriT* to recipient RNAi bacteria. For detailed description and results see Supplemental Figure 3.

149 **Robust knockdown of two GFP and RFP in muscles by CONDOR**

150 To demonstrate that CONDOR provides efficient knockdown of two genes  
 151 simultaneously we co-depleted GFP and RFP expressed in muscle nuclei as described before.  
 152 Additionally, we generated a *LoriT-GFP* RNAi plasmid and transformed into the F<sup>+</sup> *EPI300 E.*  
 153 *coli* strain (containing *pRK24-KanR*) (Fig. 3A). Subsequent conjugation with standard *HT115 E.*  
 154 *coli* containing *L4440-RFP* RNAi plasmid generated bacterial cells producing dsRNA  
 155 against both GFP and RFP (*GFP\_CON\_RFP*) (Fig. 3A-B). To assess and compare  
 156 knockdown efficiencies, the conjugated bacteria and mixed GFP+RFP RNAi bacteria were  
 157 used for double RNAi in BAT1616 worms (Fig. 3B-C). A similar result for mixed RNAi bacteria

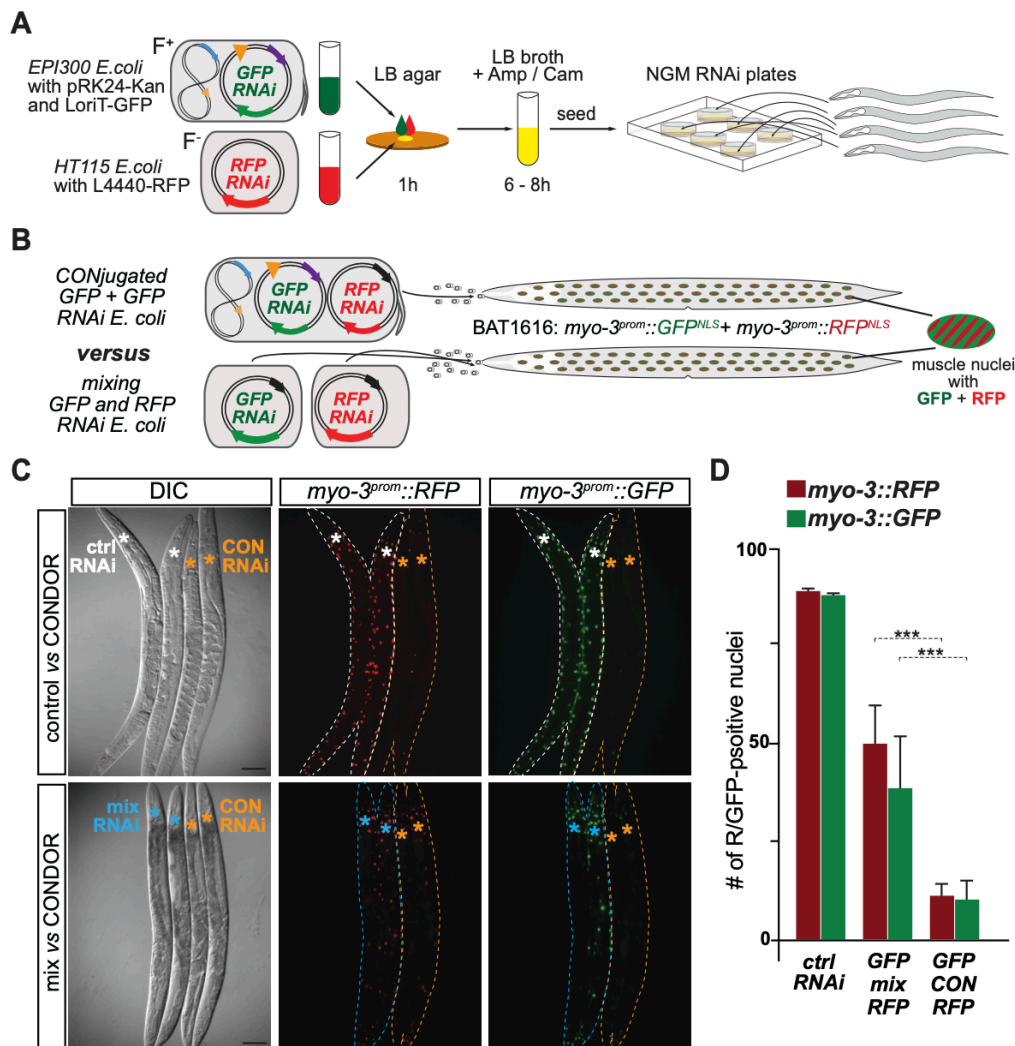

**Figure 3: CONDOR knockdown of nuclear GFP and RFP in muscles.** (A) Schematic illustration of CONDOR to generate *GFP* and *RFP* double RNAi bacteria. (B) Double RNAi against *GFP* and *RFP* in muscle nuclei of BAT1616 by CONDOR versus mixing individual RNAi bacteria. (C) Representative pictures of DIC and fluorescent signals of BAT1616 fed with RNAi bacteria against *RFP* and *GFP* either mixed or conjugated. Asterisks label pharynx of simultaneously imaged animals. Scale bars are 20  $\mu$ m. (D) Quantification of muscle nuclei number with depleted *GFP* or *RFP* signals. CONDOR is depleting *GFP* and *RFP* more efficiently than mixing RNAi bacteria. Statistics: unpaired t-test; \*\*\*p < 0,0001; n= 120. Error bars represent SEM.

158 was observed as described before, where around 50% of nuclei showed simultaneous  
159 GFP/RFP signal depletion (Fig. 1D-E; Fig. 3C-D). In contrast, the conjugated bacteria  
160 simultaneously depleted GFP and RFP signals in more than 90% of the cells.

161 The outcome of testing BAT1616 worms for double RNAi against GFP and RFP  
162 indicates a very robust double RNAi knockdown by combining RNAi plasmids in one cell via  
163 conjugation using CONDOR.

164

### 165 **CONDOR is a robust double RNAi approach also in other systems**

166 To assess the efficiency of CONDOR in targeting endogenous genes, we decided to  
167 target *oma-1* and *oma-2*, which are redundantly required for oocyte maturation (Detwiler et  
168 al., 2001). Double mutants lacking *oma-1* and *oma-2* are sterile due to immature oocytes,  
169 which accumulate in the gonads. In contrast, animals missing only *oma-1* or *oma-2* are fertile  
170 (Detwiler et al., 2001) (Fig. 4A). Wild-type worms were subjected to F1 double RNAi targeting  
171 *oma-1* and *oma-2* either by mixing the individual *oma-1* and *oma-2* RNAi bacteria, or by using  
172 conjugated *oma-1\_CON\_oma-2* RNAi bacteria (Fig. 4B-D). In this context, we also tested  
173 whether different double RNAi clones generated by conjugation are equally effective. While  
174 mixed RNAi caused an arrest of oocyte maturation in around 25% of animals, three different  
175 conjugation-derived double RNAi bacteria clones against *oma-1\_CON\_oma-2* caused around  
176 60% sterility in a reproducible manner (Fig. 4C-D). Notably, animals showed the characteristic  
177 'oma' phenotype, which leads to accumulation of immature oocytes in the gonad, indicating  
178 that sterility was indeed caused due to depletion of *oma-1* and *oma-2* (Fig. 4D).

179 Furthermore, we assessed teratoma formation of germ cells upon depletion of the  
180 translational regulators GLD-1 and MEX-3. Mutants carrying both mutations *gld-1(q485)* and  
181 *mex-3(or20)* alleles have been shown to develop teratomas in their germline that can be  
182 visualized based on expression of pan-neuronal reporters (Ciosk et al., 2006). We used  
183 worms, which express RFP in neuronal nuclei under the control of the pan-neuronal *rab-3*  
184 gene promoter (Fig. 4 E-F). Using CONDOR to target *gld-1* and *mex-3* simultaneously caused  
185 significantly more animals (35%) with germline teratomas than mixing RNAi bacteria against  
186 both genes (5%) (Fig. 4F-G). Additionally, we also targeted the 26S-Proteasome subunit  
187 genes *rpn-10* and *rpn-12*, which cause synthetic lethality when co-depleted (Takahashi et al.,  
188 2002). While CONDOR-mediated simultaneous knockdown of *rpn-10* and *rpn-12* reduced  
189 survival by around 50%, only 25% of the animals fed with mixed *rpn-10* and *rpn-12* RNAi  
190 bacteria died (Supp. Fig. 4).

191 Overall, our results provide evidence that CONDOR is a highly robust technique for  
192 simultaneous knockdown of endogenous genes by double RNAi.

193



194

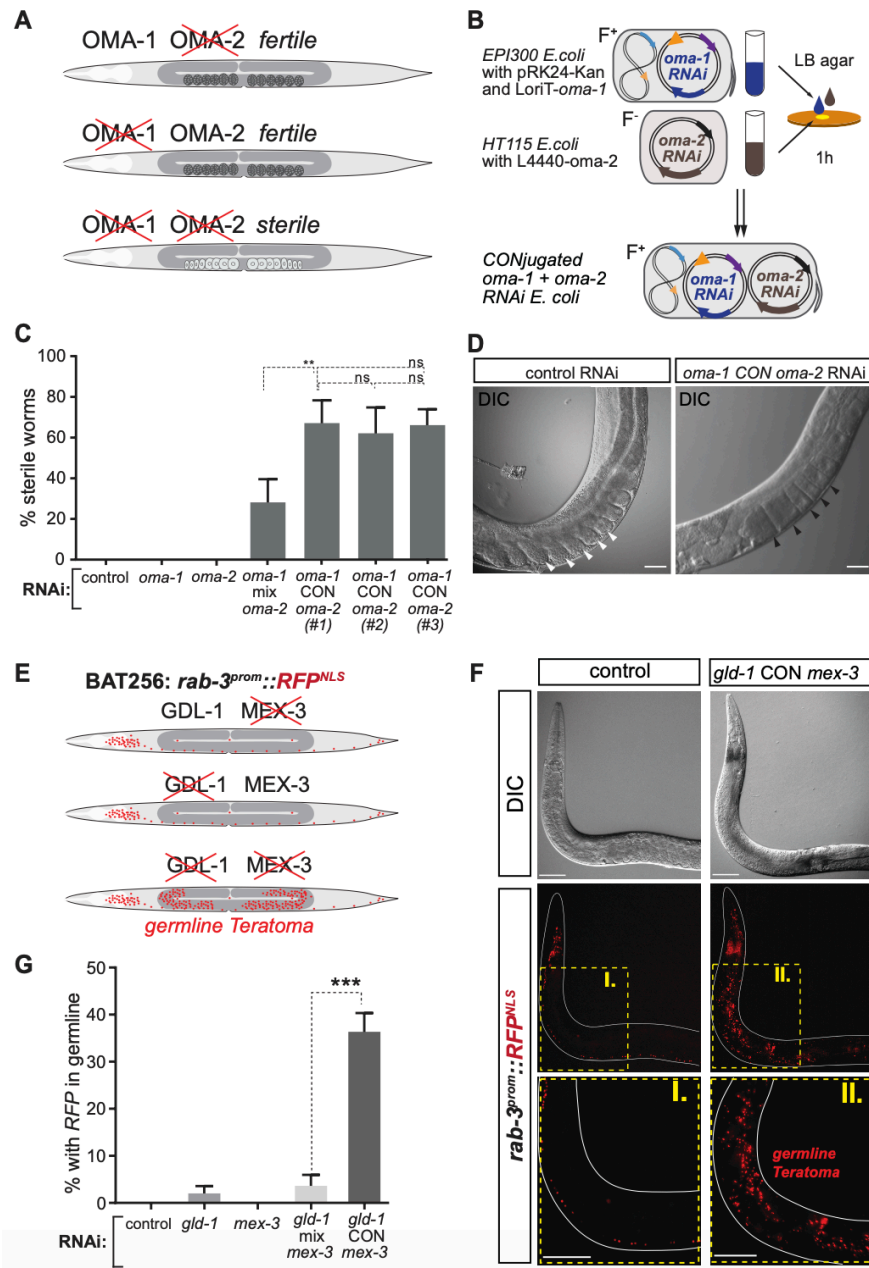

**Figure 4: CONDOR knockdown of two endogenous genes.** (A) Double depletion of *oma-1* and *oma-2* causes sterility due to immature oocytes. (B) Schematic illustration of CONDOR to generate *oma-1*\_CON\_*oma-2* double RNAi bacteria. (C) Three independent *oma-1*\_CON\_*oma-2* bacteria clones were tested and compared to mixing RNAi bacteria against *oma-1* and *oma-2*. Quantification of sterile animals displays higher efficiency of CONDOR for all three tested *oma-1*\_CON\_*oma-2* clones compared to mixed RNAi bacteria. Statistics: unpaired t-test; \*\*p < 0,001; n= 140, ns = not significant. Error bars represent SEM. (D) Representative DIC pictures of gonad region of control animals and *oma-1*\_CON\_*oma-2* double RNAi treated animals. White arrow heads depict embryos, black arrow heads indicate accumulation of immature oocytes. Scale bars are 10  $\mu$ m. (E) Double depletion of *gld-1* and *mex-3* leads to teratoma formation in the germline. (F) Representative fluorescence signal pictures of animals expressing the pan-neuronal reporter *rab-3::RFP<sup>NLS</sup>*. Double RNAi using CONDOR against *gld-1* and *mex-3* leads to teratoma formation visualized by the expression of neuronal RFP signals in the germline. Scale bars are 10  $\mu$ m. (G) Quantification of teratoma formation confirms significantly increased induction of teratoma formation upon feeding with *gld-1*\_CON\_*mex-3* bacteria compared to mixed RNAi bacteria against *gld-1* and *mex-3*. Statistics: unpaired t-test; \*\*\*p < 0,0001; n= 100. Error bars represent SEM.

195 **Epigenetic barriers of germ cell reprogramming to neuron-like cells**

196 It was previously discovered that the epigenetic factor LIN-53, which can directly bind to  
 197 histones, acts as a reprogramming barrier in the germline. RNAi against *lin-53* allows germ  
 198 cell reprogramming to defined types of neuronal cells upon overexpression of specific  
 199 transcription factors (TF). Overexpression of the Zn-finger TF CHE-1 induces conversion to  
 200 glutamatergic ASE neuron-like cells labelled by expression of the ASE neuron-specific  
 201 reporter *gcy-5::GFP* (Fig. 5A). The Pitx-type homeodomain TF UNC-30 is required for the  
 202 specification of GABAergic motor neurons. Consequently, its overexpression in *lin-53* RNAi  
 203 animals induces the GABA fate marker *unc-25::GFP* in germ cells (Fig. 5B). However, the  
 204 induction of *unc-25::GFP* by UNC-30 is less efficient than *gcy-5::GFP* induction by CHE-1 (Fig.  
 205 5C). We speculated that this discrepancy may be due to additional epigenetic barriers that  
 206 limit ectopic induction of the GABAergic motor neuron fate (Fig. D).

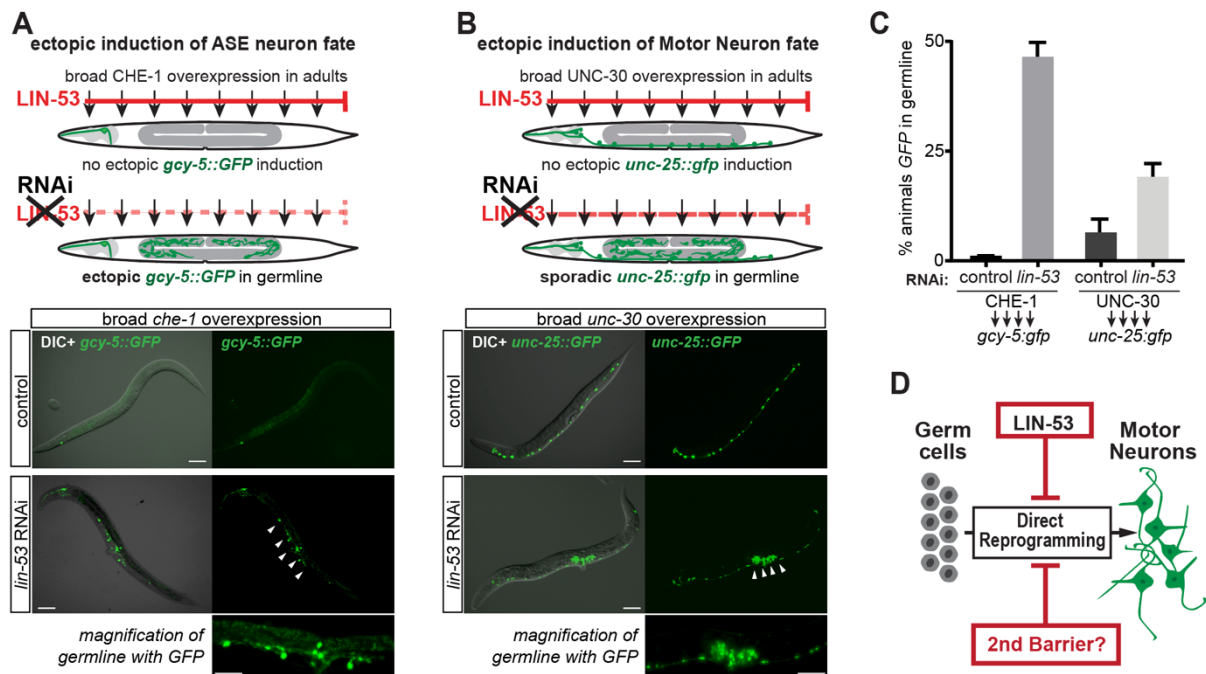

**Figure 5: Epigenetic barriers of germ cell to neuron reprogramming in *C. elegans*.** (A) Schematic illustration of transgenic animals expressing the glutamatergic ASE neuron fate marker *gcy-5::GFP* and allowing heat-shock-inducible broad CHE-1 overexpression. DIC / GFP pictures of animals with germ cells reprogrammed to ASE neurons upon depletion of the histone chaperone LIN-53 and broad overexpression of CHE-1. White arrow heads indicate germline with reprogrammed cells (this area is magnified below). (B) Schematic illustration of transgenic animals expressing the GABAergic motor neuron fate marker *unc-25::GFP* and allowing heat-shock-inducible broad UNC-30 overexpression. DIC / GFP signal pictures of animals with germ cells reprogrammed to GABAergic neurons upon depletion of LIN-53 and broad overexpression of UNC-30. White arrow heads indicate germline with reprogrammed cells (area is shown in magnification below). (C) Quantification of germ cell to neuron reprogramming by CHE-1 and UNC-30 upon *lin-53* RNAi. Induction of the GABA fate marker by UNC-30 is less efficient. Error bars represent SEM. (D) A second barrier may decrease germ cell to GABAergic motor neuron conversion.

207 The task to screen for a putative ‘2<sup>nd</sup> barrier’ by co-depleting *lin-53* with other chromatin  
208 regulators provided an attractive test case to perform CONDOR for a large set of double RNAi  
209 knockdowns.

210

### 211 **CONDOR identifies RBBP-5 as a novel reprogramming barrier**

212 To identify additional epigenetic regulators, which may be involved in limiting the  
213 conversion of germ cells to GABAergic neurons, we decided to conjugate the *LoriT-lin-53*  
214 plasmid with around 700 other RNAi clones that target chromatin-related genes based on our  
215 previously described chromatin RNAi library (Hajduskova et al., 2019) (Fig. 6A).

216 Worms were subjected to CONDOR in an F1 RNAi screen and heat-shocked as young  
217 adults to induce broad expression of the GABA motor neuron fate-inducing TF UNC-30 (Fig.  
218 6A-B). One day later we scored for animals showing ectopic *unc-25::GFP* expression in their  
219 germline (Fig. 6C). Among the more than 700 tested *lin-53* co-depletions, we found that worms  
220 fed with bacteria derived from conjugating *LoriT-lin-53* with *L4440-rbbp-5* (*lin-53\_CON\_rbbp-*  
221 *5*) showed a marked increase of the *unc-25::GFP* induction rate in the germline (Fig. 6C). The  
222 *rbbp-5* gene encodes for the Set1/MLL methyltransferase complex member RBBP-5 and is  
223 the ortholog of human RBBP5 (RB binding protein 5) (Beurton et al., 2019) . Next, we  
224 compared *lin-53\_CON\_rbbp-5* to single RNAi against *rbbp-5*, *lin-53* or *L4440-lin-53 mixed with*  
225 *L4440-rbbp-5* RNAi bacteria (Fig. 6D). We noticed that knockdown of *rbbp-5* alone provides a  
226 similar number of animals with germlines positive for *unc-25::GFP* as RNAi against *lin-53* (Fig.  
227 6D). However, CONDOR-mediated knockdown of *lin-53* and *rbbp-5* simultaneously (*lin-*  
228 *53\_CON\_rbbp-5*) almost doubled the efficiencies of single RNAi knockdowns (Fig. 6D).  
229 Notably, double RNAi by mixing bacteria yields a similar number of animals with germlines  
230 positive for *unc-25::GFP* as single RNAi against *lin-53* or *rbbp-5* (Fig. 6D). A lack of additive  
231 or synergistic enhancement could be interpreted as a cooperative function of LIN-53 and  
232 RBBP-5 in the same pathway or complex to counteract germ cell conversion. However,  
233 CONDOR against *lin-53* and *rbbp-5* indicates an additive effect compared to single RNAi  
234 against *lin-53* and *rbbp-5*, rather suggesting functions in separate processes. Together with  
235 previous comparisons of double RNAi by mixing versus CONDOR our results provide  
236 evidence that CONDOR is suitable for double RNAi to assess genetic interactions, which may  
237 be more accurate compared to mixing RNAi bacteria clones.

238 Overall, we show that our newly developed CONDOR technique is highly efficient to  
239 conduct high-throughput double RNAi screens. By using CONDOR we identified the Set1/MLL  
240 methyltransferase complex member RBBP-5 as a previously undiscovered germ cell  
241 reprogramming barrier demonstrating versatility and robustness of this novel double RNAi  
242 technique.

243

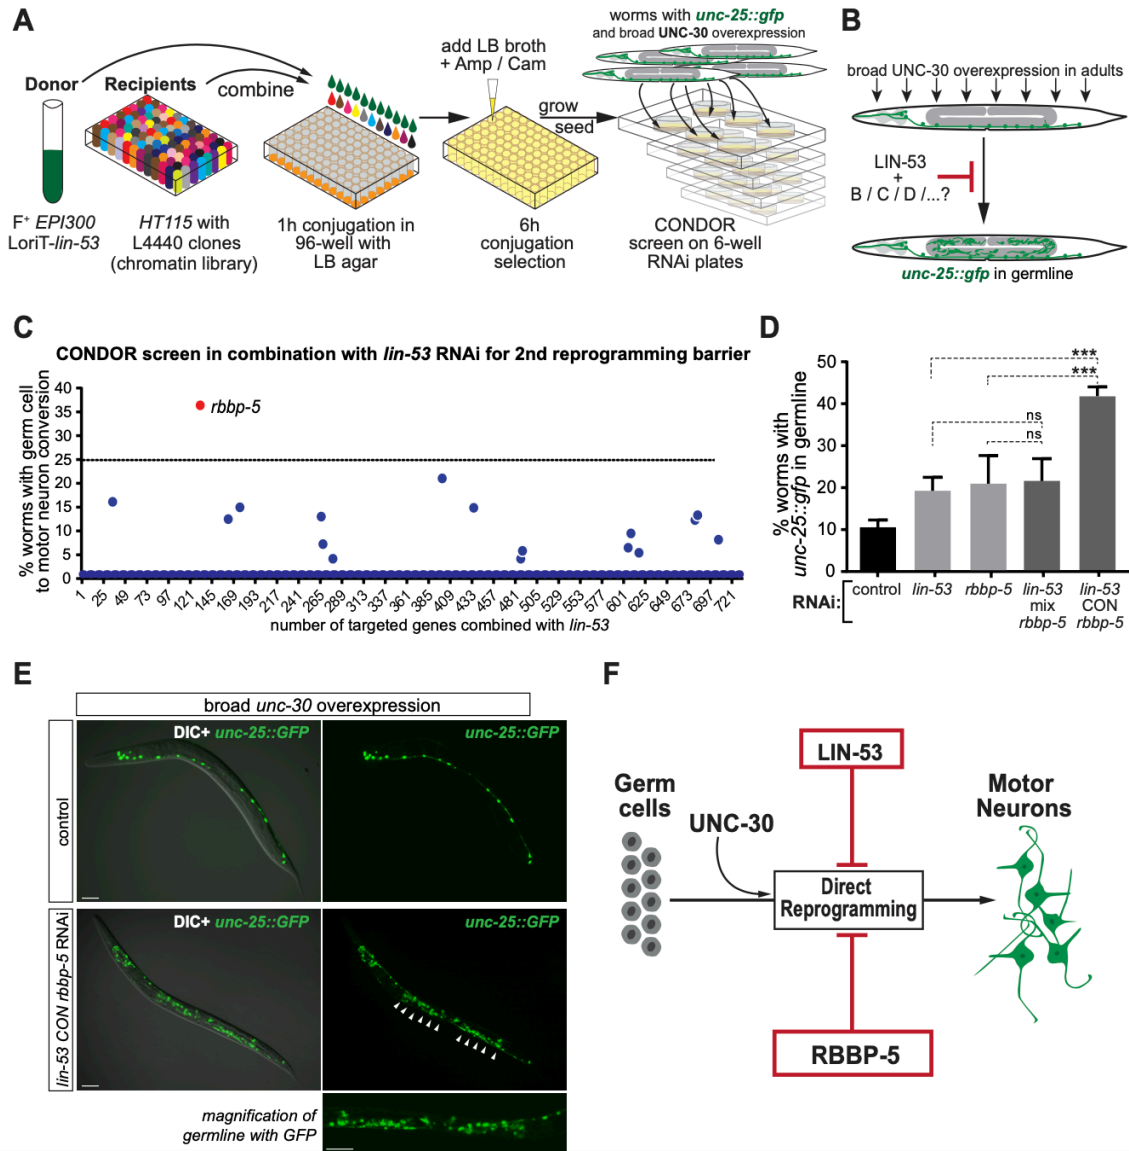

**Figure 6: CONDOR identifies RBBP-5 as a novel barrier of germ cell to neuron reprogramming.** (A) Illustration of CONDOR to generate double RNAi bacteria targeting *lin-53* together with around 700 other chromatin regulators. F<sup>+</sup> EPI300 bacteria containing *LoriT-lin-53* conjugation with HT1115 RNAi bacteria clones from the previously published chromatin RNAi library (Hajduskova et al., 2019). (B) Transgenic animals expressing the GABAergic motor neuron fate marker *unc-25::GFP* and allowing heat-shock-inducible broad UNC-30 overexpression were fed with conjugated bacteria to assess germ cell to neuron conversion. (C) CONDOR screening for animals with GABAergic fate marker *unc-25::GFP* ectopic expression in the germline. Feeding of *LoriT-lin-53* conjugated with *rbbp-5* RNAi bacteria resulted in a marked increase of *unc-25::GFP* expression induction in the germline. The stippled line indicates the chosen cut-off for enhancement. (D) Direct comparison of *lin-53*\_CON\_*rbbp-5* to single RNAi against *rbbp-5*, *lin-53*, and L4440-*lin-53* mixed with L4440-*rbbp-5* HT1115 RNAi bacteria. CONDOR is allowing GABAergic fate reporter expression in the germline more efficiently than mixing RNAi bacteria. Statistics: unpaired t-test; \*\*\*p < 0,0001; ns = not significant; Error bars represent SEM. (E) Representative DIC / GFP signal pictures of animals with germ cells expressing the GABAergic neuron fate reporter *unc-25::GFP* upon simultaneous depletion of LIN-53 and RBBP-5 by CONDOR and broad overexpression of UNC-30. White arrow heads indicate germline with reprogrammed cells (this area is shown in magnification below). (F) Model of preventing germ cell conversion to GABAergic motor neurons by RBBP-5 and LIN-53.

## 244 DISCUSSION

245 Depletion of gene activities by RNAi-mediated knockdown is essential for  
246 investigating gene functions. In particular, genes that cause embryonic lethality or  
247 developmental arrest when fully eliminated by knockout approaches (e.g. by mutagenesis  
248 or CRISPR/Cas9-mediated excision) can often not be interrogated for their implication in  
249 post-developmental processes. Yet, RNAi-mediated co-depletion of such essential genes  
250 to investigate complex biological processes in *C. elegans* are challenging. Previous  
251 approaches, such as feeding mixed RNAi bacteria, suffer from robustness, as we  
252 demonstrate also in this study, or are not practicable for high-throughput screens. For  
253 instance, ‘stitching’ together two target genes by cloning into the *L4440* plasmid to produce  
254 dsRNA against both targets in the same bacterial cell has been shown to mediate robust  
255 double RNAi (Gouda et al., 2010). While this approach is certainly a reliable method for  
256 double RNAi, generating, e.g., 700 new plasmids each containing two target genes with  
257 subsequent bacterial transformations limits practicability and flexibility for high-throughput  
258 double RNAi screens.

259 We developed a new method of conducting combinatorial RNAi in *C. elegans* based  
260 on bacterial conjugation, which we termed CONDOR. By creating a two-component  
261 system consisting of conjugation-competent F<sup>+</sup> *E. coli* (based on *EPI300*), which contain  
262 the F-plasmid *pRK24-KanR*, and a modified RNAi donor plasmid *LoriT*, we are able to co-  
263 deplete genes simultaneously in a robust manner. We demonstrate CONDOR for model  
264 targets (*GFP* and *RFP* in muscle nuclei) as well for several endogenous genes. Sterility  
265 due to defective oocyte maturation is caused when both *oma-1* and *oma-2* genes are co-  
266 depleted (Detwiler et al., 2001). This ‘*oma*’ phenotype is caused with significantly higher  
267 efficiency by CONDOR when compared to mixing the two *oma-1* and *oma-2* *HT115* RNAi  
268 bacteria. Moreover, feeding conjugated bacteria versus mixed bacteria consistently  
269 induced double RNAi with higher efficiency against all tested gene combinations such as  
270 *mex-3* and *gld-1* (germline teratomas) as well as *rpn-10* and *rpn-12* (lethality).

271 Based on the robustness of CONDOR we were able to identify the Set1/MLL  
272 methyltransferase complex member RBBP-5 (Beurton et al., 2019) as a novel germ cell  
273 reprogramming barrier. The rationale for using CONDOR to screen for chromatin factors  
274 that counteract germ cell reprogramming was based on our observation that  
275 overexpression of UNC-30 in animals with RNAi against the previously identified germ cell  
276 reprogramming barrier LIN-53 (Patel et al., 2012; Seelk et al., 2016; Tursun et al., 2011)  
277 yielded only a limited number of animals with GABAergic motor neuron fate in germ cells.  
278 Feeding worms with conjugated bacteria containing *lin-53* RNAi (*LoriT-lin-53*) and *rbbp-5*  
279 RNAi (*L4440-rbbp-5*) led to increased ectopic induction of the GABAergic neuron fate in  
280 germ cells.

281 Notably, comparison of *lin-53\_CON\_rbbp-5* to single or mixed RNAi against *rbbp-5*, *lin-*  
282 *53* or *L4440-lin-53* mixed with *L4440-rbbp-5* RNAi bacteria revealed almost a doubling of the  
283 number of animals with germlines positive for the GABA neuron fate reporter *unc-25::GFP*. In  
284 contrast, mixed double RNAi against *lin-53* and *rbbp-5* showed similar numbers as single RNAi  
285 against *lin-53* or *rbbp-5*. Such lack of enhancement during genetic interaction testing is usually  
286 being interpreted as LIN-53 and RBBP-5 functioning in the same pathway or complex.  
287 Generally, it should be mentioned here that RNAi is not ideal to examine genetic interactions.  
288 To assess synergistic, synthetic, or additive effects upon loss of two genes, principally the use  
289 of null-mutants allow more consistent conclusions. Yet, knockdown by CONDOR of *lin-53* and  
290 *rbbp-5* revealed an additive effect compared to mixed double RNAi. This result suggests  
291 functions of the chromatin-regulating factors LIN-53 and RBBP-5 in separate regulatory  
292 pathways. This notion is supported by previous studies showing that LIN-53 cooperates with  
293 the PRC2 chromatin silencer to safeguard the germ cell fate and counteract conversion to  
294 neurons (Patel et al., 2012; Seelk et al., 2016). Depletion of LIN-53 or PRC2 subunits resulted  
295 in a global loss of chromatin silencing in the germline as revealed by abolished H3K27  
296 methylation (Patel et al., 2012). In contrast, it was demonstrated that RNAi against *rbbp-5*,  
297 which is part of the chromatin-regulating complex SET1/MLL/COMPASS (Beurton et al., 2019;  
298 Li and Kelly, 2011), reduces H3K4 methylation in the germline. Thus, the enhancement  
299 observed upon simultaneous RNAi knockdown of *lin-53* together with *rbbp-5* is likely due to  
300 distinct effects on germline chromatin. The finding that LIN-53 and RBBP-5 may act in parallel  
301 pathways due to the observed additive effect suggests that CONDOR provides a reliable  
302 technique for double RNAi to assess genetic interactions. Mutants of these essential genes  
303 can otherwise not be tested in the context of germline safeguarding in adult animals due to  
304 lethality or early developmental arrest (Li and Kelly, 2011; Lu and Horvitz, 1998). Generally,  
305 double RNAi by CONDOR may provide more accurate genetic interaction testing of essential  
306 genes as compared to mixing RNAi bacteria clones.

307 Yet, the exact mechanism of how RBBP-5 safeguards the germline to prevent  
308 conversion to GABAergic motor neuron-like cells remains to be determined and will be subject  
309 of future research efforts. Here, we used the identification of RBBP-5 to highlight the power  
310 and versatility of CONDOR and provide evidence for its efficiency. As most biological  
311 processes are co-regulated by the orchestrated activity of several genes, CONDOR opens  
312 new perspectives for all research fields that make use of the genetic model *C. elegans* to  
313 address open question *in vivo*. Moreover, robust triple RNAi could be performed by 'stitching'  
314 two target genes into *LoriT* with subsequent conjugation to other RNAi clones thereby further  
315 increasing the multiplexing of knockdowns. Overall, further developments such as CONDOR  
316 are likely to increase the complexity of RNAi screens for investigating biological processes in  
317 an unprecedented manner.

## 318 MATERIAL AND METHODS

319

### 320 *Nematode cultures*

321 Animals were maintained according to standard procedures (Stiernagle, 2006). Heat-shock  
322 sensitive strains were kept at 15°C.

323

### 324 *Caenorhabditis elegans* (*C. elegans*) worm strains

325 N2: wild isolate, Bristol variant.

326 BAT28: *otIs305[hsp-16.2p::che-1::3xHA, rol-6(su1006)] ntl1[gcy-5p::gfp, lin-15(+)] V*

327 BAT256: *otIs355 [rab-3::NLS::TagRFP] IV*

328 BAT684: *juls8 [unc-25::GFP]; barEx147 [hsp- 16.2/4::unc-30]*

329 BAT1616: *ccls4251 [myo-3p::NLS::gfp] I; barIs112 [myo-3p::NLS::tagRFP, HygR] X;*

330

### 331 *Synchronized worm population*

332 Synchronized worms were obtained by bleaching hermaphrodites with eggs or by L1 arrest.  
333 Gravid hermaphrodites were treated with household bleach (5% sodium hypochlorite) mixed  
334 with 1M NaOH and water (3:2:5) Following worm lysis, eggs were washed three times with  
335 M9 buffer. For harvesting L1 worms, plates with freshly hatched L1 larvae were collected by  
336 washing off with M9 buffer + gelatin. Arrested L1 larvae and bleached eggs were either applied  
337 directly onto RNAi or regular NGM plates.

338

### 339 *Escherichia coli* (*E. coli*) bacterial strains:

340 *OP50*: uracil auxotroph

341 *HT115*: F-, *mcrA*, *mcrB*, *IN(rrnD-rrnE)1*, *mc14::Tn10*(DE3 lysogen: *lacUV5* promoter -T7  
342 polymerase) (IPTG-inducible T7 polymerase) (RNase III minus).

343 *EPI300*: F- *mcrA*  $\Delta$ (*mrr-hsdRMS-mcrBC*)  $\Phi$ 80 $\Delta$ *lacZ* $\Delta$ *M15*  $\Delta$ *lacX74* *recA1* *endA1* *araD139*

344 *SW105*: *SW103*  $\Delta$ *galK*

345

### 346 *Generation of pRK24-KanR and LoriT*

347 *pRK24-KanR* (dBT847 Tursun lab name) was constructed by recombineering to replace  
348 Ampicillin resistance (*AmpR*) of *pRK24* (Meyer et al., 1979) with Kanamycin resistance (*KanR*)  
349 because *L4440* used in the standard 'Ahringer' *C. elegans* RNAi library (Kamath et al., 2003)  
350 already carries *AmpR*. Recombineering was performed as previously described (Tursun et al.,  
351 2009). Primer to PRC amplify the *KanR* cassette for recombineering were:

352 FWD: GAA GTT TTA AAT CAA TCT AAA GTA TAT ATG AGT AA ACT TGG TCT GAC AGt  
353 tat tag aaa aat tca tcc agc aga cg;

354 REV: TGT ATT TAG AAA AAT AAA CAA ATA GG GGT TCC GCG CAC ATT TCC CCGAAA  
355 AGc gcg gaa ccc cta ttt gt tta ttt ttc.

356 Generating the 'donor' RNAi plasmid *LoriT*, required addition of the *oriT* which allows transfer  
357 by conjugation. AmpR of L4440 was replaced with Chloramphenicol (CamR) resistance to  
358 allow selection for presence of *LoriT* together with the resident AmpR-containing L4440 RNAi  
359 plasmid after conjugation. Primers used to PCR amplify *oriT* and *CamR* for GIBSON cloning  
360 were:

361 *oritFWD*: cca ccg gtt cca tgg GGC GCT CGG TCT TGC CTT;

362 *oritREV*: cca cgc gtc acg tgg AGC GCT TTT CCG CTG CAT AAC.

363 Further information can be found in Supplemental Figure 2 B – C and in [Suppl. Table 2](#). *prK24-*  
364 *KanR* and *LoriT* will be made available through Addgene upon publication of this manuscript.

365

#### 366 *Generation of donor bacteria: F<sup>+</sup> EPI300 with LoriT*

367 The recombination deficient *E. coli* strain *EPI300* is transformed with pRK24-KanR to generate  
368 a stable F<sup>+</sup> strain, which can conjugate with other bacteria. F<sup>+</sup> *EPI300* (containing *prK24-*  
369 *KanR*) was made electrocompetent for transformation and aliquots were frozen as previously  
370 described (Tursun et al., 2009). Alternatively, F<sup>+</sup> *EPI300* can be kept as a standard glycerol  
371 stocks and made electrocompetent when needed (see below). Gene sequence of the target  
372 gene is inserted into the multiple cloning site of the plasmid *LoriT* (L4440 plasmid derivative  
373 containing *oriT* and *CamR* instead of AmpR). The RNAi plasmid *LoriT-target-gene* is  
374 electroporated into F<sup>+</sup> *E. coli EPI300* to generate the donor RNAi bacteria. In brief, bacteria  
375 are grown until reaching an OD600 between 0.4 and 0.8, put on ice for 15 minutes. The cells  
376 are pelleted at 4°C for 15 minutes and washed with ice-cold ddH<sub>2</sub>O. The cells are pelleted  
377 once more at 4°C and the supernatant is removed except ~0.5 mL. Into an aliquot of 100 µL  
378 of F<sup>+</sup> *EPI300*, 50 ng of donor RNAi plasmid (*LoriT-target-gene*) DNA is being added,  
379 transferred to electroporation cuvette (0.2 cm electrode gap) and incubated for 2 minutes on  
380 ice. The sample is then electroporated by pulsing with 2.5 kV using a standard electroporator.  
381 After electroporation 900 µL of LB medium are added and the bacteria are incubated at 37°C  
382 for 1 hour under shaking. The cells are plated on selective LB-KanR/CamR plates and  
383 incubated overnight at 37°C. Single colonies are picked and grown to prepare glycerol stocks  
384 of F<sup>+</sup> *EPI300* bacteria that are competent for conjugation and can transfer *LoriT-target-gene*.

385

#### 386 *Generation of double RNAi bacteria clones by conjugation*

387 On day one 96-well plates filled with 100 µL LB agar are prepared and dried overnight. Donor  
388 F<sup>+</sup> *EPI300* (with e.g. *LoriT-lin-53* as used in this study) and recipient F<sup>-</sup> *HT115* bacteria of the  
389 Ahringer RNAi library clones were grown overnight at 37°C to saturation. Depending on the  
390 number of conjugations, the F<sup>-</sup> *HT115* bacteria with Ahringer RNAi clones should be grown in



391 a 96-well format (deep-well). Donor F<sup>+</sup> bacteria are pelleted at 4°C and 80% of supernatant is  
392 removed resulting in an approximately 5x up-concentration. 5 µL of donor and recipient  
393 bacteria are pipetted in equal amounts of on LB agar containing 96-well plates, covered with  
394 a lid or aluminum foil and incubated for 1 h at 37°C. After incubation, 100 µL of LB-  
395 Amp/Tet/Cam medium is added and the plates are incubated for another 6 hours under mild  
396 shaking. Afterwards, about 5 µL from each well are transferred into a new 96 deep-well plate  
397 containing LB-Amp/Cam. The second selection step does not contain tetracycline (Tet) as this  
398 affects the worms negatively. The 96-deep-well plates are incubated overnight at 37°C under  
399 shaking and the conjugated RNAi bacteria are ready to be seeded onto NGM RNAi plates.  
400 For further information of RNAi clones used in the study see [Suppl.Table 1](#).

401

402 *Determining and confirming successful conjugation (for proof of concept in this study only)*

403 Conjugated RNAi plasmid-containing bacteria clones were confirmed by colony PCR upon  
404 growth on Amp/Cam. Donor RNAi plasmid containing bacteria (e.g. *LoriT-lin-53* as used in  
405 this study) in the F-plasmid *pRK24-KanR*-containing *EPI300* bacteria were grown overnight to  
406 saturation, mixed at a 1:5 ratio on LB agar plates, incubated for 1 hour at 37°C, washed off  
407 and plated on LB-Kan/Amp/Cam plates to select for conjugated bacteria clones containing the  
408 donor RNAi plasmid and the F-plasmid *pRK24-KanR*.

409

410 *RNA interference experiments*

411 The reprogramming experiments were carried out by feeding the animals with bacteria  
412 containing conjugated or standard RNAi clones. Generally, we performed F1 RNAi by  
413 exposing L4 stage larval animals to RNAi plates. For germ cell reprogramming experiments,  
414 plates were kept at 15°C and the following F1 generation was heat shocked at L3/L4 stage for  
415 30 minutes at 37°C. Afterwards animals were kept at 25°C overnight and scored 24 hours post  
416 heat-shock for ectopic induction of *gcy-5::GFP* or *unc-25::GFP*. For double RNAi by mixing,  
417 bacteria were grown as saturated cultures. The OD600 was measured to ensure that bacteria  
418 were mixed at an equal ratio and seeded on standard RNAi plates (Hajduskova et al., 2019).  
419 For further information on media recipes used in the study see [Suppl.Table 3](#).

420

421 *Microscopy*

422 For imaging, worms were mounted on freshly made 2% agarose pads using 10 mM  
423 tetramizole hydrochloride in M9 buffer to anesthetize animals. Microscopy analyses were  
424 performed using the ZEISS Axio Imager.M2 (Zeiss) equipped with the Sensicam CCD camera  
425 by PCO Imaging. For image acquisition MicroManager plugin in ImageJ was used (Edelstein  
426 et al., 2010, 2014). Acquired picture were processed using ImageJ.

427

428

429

## 430 **ACKNOWLEDGMENTS**

431 We thank Sergej Herzog for technical assistance. We also thank the CGC, supported by the  
432 NIH, for providing strains. This work was partly sponsored by the ERC-StG-2014-637530 and  
433 the Max Delbrueck Center for Molecular Medicine in the Helmholtz Association. All procedures  
434 conducted in this study were approved by the Berlin State Department for Health and Social  
435 (LaGeSo). The authors declare that they have no competing interests.

436

## 437 **AVAILABILITY OF DATA AND MATERIALS**

438 *C. elegans* strains generated in this study will be made available through CGC  
439 (<https://cgc.umn.edu>). The plasmids *pRK24-KanR* and *LoriT* will be available via Addgene  
440 ([www.addgene.org](http://www.addgene.org)).

441

## 442 **AUTHORS' CONTRIBUTIONS**

443 MK, CFD, AO and BT conducted experiments, analyzed the data, and helped with the  
444 experimental design. MK and BT conceptualized and designed the project, and BT finalized  
445 the manuscript. All authors read and approved the final manuscript.

446

## 447 **MAIN FIGURES**

448

449 **Figure 1: Double RNAi in *C. elegans* by feeding mixed RNAi bacteria.** (A) RNAi in *C.*  
450 *elegans* is straightforward by feeding dsRNA-producing *E. coli* (*HT115* strain). dsRNA against  
451 the target gene is produced from the L4440 RNAi plasmid. (B) Double RNAi to knockdown  
452 two genes simultaneously by mixing two RNAi bacteria clones. (C) Illustration of transgenic  
453 BAT1616 worms expressing RFP and GFP in nuclei of muscles. Using the *myo-3* promoter  
454 95 body wall muscle nuclei in hermaphrodites are labelled. (D) Representative pictures of DIC  
455 and fluorescent signals of BAT1616 fed with RNAi bacteria against RFP and GFP either mixed  
456 or individually. Asterisks label pharynx of simultaneously imaged animals. Scale bars are 20  
457  $\mu\text{m}$ . (E and F) Quantification of muscle nuclei number with depleted GFP or RFP signals.  
458 Statistics: unpaired t-test; \*\*\* $p < 0,0001$ ; \*\* $p < 0,001$ .  $n = 200$ . Error bars represent SEM (G)  
459 Illustration of proposition to increase robustness of double RNAi by combining two RNAi  
460 plasmids in bacterial cells.

461

462 **Figure 2: Creating a double RNAi system by bacterial conjugation.** (A) The F-plasmid  
463 (fertility factor) encodes for components of the conjugation machinery to transfer *oriT*-

464 containing genetic material. Recombineering was used to replace Ampicillin resistance  
465 (AmpR) with Kanamycin resistance (KanR) to allow combination with RNAi plasmids. (B) *LoriT*  
466 plasmid: we equipped the *L4440* RNAi plasmid (used for clones of the Ahringer RNAi library)  
467 with *oriT* and exchanged AmpR with Chloramphenicol resistance (CamR). (C) *pRK24-KanR*-  
468 containing *EPI300 E. coli* are F<sup>+</sup> and can conjugate with *HT115* RNAi bacteria clones of the  
469 Ahringer RNAi library, which are F<sup>-</sup>. Conjugated bacteria are selected based on CamR / AmpR.  
470 (D) Different conjugation procedures were evaluated for most efficient transfer of *LoriT* to  
471 recipient RNAi bacteria. For detailed description and results see Supplemental Figure 3.

472

473 **Figure 3: CONDOR knockdown of nuclear GFP and RFP in muscles.** (A) Schematic  
474 illustration of CONDOR to generate *GFP* and *RFP* double RNAi bacteria. (B) Double RNAi  
475 against *GFP* and *RFP* in muscle nuclei of BAT1616 by CONDOR versus mixing individual  
476 RNAi bacteria. (C) Representative pictures of DIC and fluorescent signals of BAT1616 fed  
477 with RNAi bacteria against *RFP* and *GFP* either mixed or conjugated. Asterisks label pharynx  
478 of simultaneously imaged animals. Scale bars are 20  $\mu$ m. (D) Quantification of muscle nuclei  
479 number with depleted *GFP* or *RFP* signals. CONDOR is depleting *GFP* and *RFP* more  
480 efficiently than mixing RNAi bacteria. Statistics: unpaired t-test; \*\*\*p < 0,0001; n= 120. Error  
481 bars represent SEM.

482

483 **Figure 4: CONDOR knockdown of two endogenous genes.** (A) Double depletion of *oma-1*  
484 and *oma-2* causes sterility due to immature oocytes. (B) Schematic illustration of CONDOR  
485 to generate *oma-1\_CON\_oma-2* double RNAi bacteria. (C) Three independent *oma-1\_CON\_*  
486 *oma-2* bacteria clones were tested and compared to mixing RNAi bacteria against *oma-1* and  
487 *oma-2*. Quantification of sterile animals displays higher efficiency of CONDOR for all three  
488 tested *oma-1\_CON\_oma-2* clones compared to mixed RNAi bacteria. Statistics: unpaired t-  
489 test; \*\*p < 0,001; n= 140, ns = not significant. Error bars represent SEM. (D) Representative  
490 DIC pictures of gonad region of control animals and *oma-1\_CON\_oma-2* double RNAi treated  
491 animals. White arrow heads depict embryos, black arrow heads indicate accumulation of  
492 immature oocytes. Scale bars are 10  $\mu$ m. (E) Double depletion of *gld-1* and *mex-3* leads to  
493 teratoma formation in the germline. (F) Representative fluorescence signal pictures of animals  
494 expressing the pan-neuronal reporter *rab-3::RFP<sup>NLS</sup>*. Double RNAi using CONDOR against  
495 *gld-1* and *mex-3* leads to teratoma formation visualized by the expression of neuronal RFP  
496 signals in the germline. Scale bars are 10  $\mu$ m. (G) Quantification of teratoma formation  
497 confirms significantly increased induction of teratoma formation upon feeding with *gld-*  
498 *1\_CON\_mex-3* bacteria compared to mixed RNAi bacteria against *gld-1* and *mex-3*. Statistics:  
499 unpaired t-test; \*\*\*p < 0,0001; n= 100. Error bars represent SEM.

500 **Figure 5: Epigenetic barriers of germ cell to neuron reprogramming in *C. elegans*.** (A)  
501 Schematic illustration of transgenic animals expressing the glutamatergic ASE neuron fate  
502 marker *gcy-5::GFP* and allowing heat-shock-inducible broad CHE-1 overexpression. DIC /  
503 GFP pictures of animals with germ cells reprogrammed to ASE neurons upon depletion of the  
504 histone chaperone LIN-53 and broad overexpression of CHE-1. White arrow heads indicate  
505 germline with reprogrammed cells (this area is magnified below). (B) Schematic illustration of  
506 transgenic animals expressing the GABAergic motor neuron fate marker *unc-25::GFP* and  
507 allowing heat-shock-inducible broad UNC-30 overexpression. DIC / GFP signal pictures of  
508 animals with germ cells reprogrammed to GABAergic neurons upon depletion of LIN-53 and  
509 broad overexpression of UNC-30. White arrow heads indicate germline with reprogrammed  
510 cells (area is shown in magnification below). (C) Quantification of germ cell to neuron  
511 reprogramming by CHE-1 and UNC-30 upon *lin-53* RNAi. Induction of the GABA fate marker  
512 by UNC-30 is less efficient. Error bars represent SEM. (D) A second barrier may decrease  
513 germ cell to GABAergic motor neuron conversion.

514

515 **Figure 6: CONDOR identifies RBBP-5 as a novel barrier of germ cell to neuron**  
516 **reprogramming.** (A) Illustration of CONDOR to generate double RNAi bacteria targeting *lin-*  
517 *53* together with around 700 other chromatin regulators. F<sup>+</sup> *EPI300* bacteria containing *LoriT-*  
518 *lin-53* conjugation with *HTT115* RNAi bacteria clones from the previously published chromatin  
519 RNAi library (Hajduskova et al., 2019). (B) Transgenic animals expressing the GABAergic  
520 motor neuron fate marker *unc-25::GFP* and allowing heat-shock-inducible broad UNC-30  
521 overexpression were fed with conjugated bacteria to assess germ cell to neuron conversion.  
522 (C) CONDOR screening for animals with GABAergic fate marker *unc-25::GFP* ectopic  
523 expression in the germline. Feeding of *LoriT-lin-53* conjugated with *rbbp-5* RNAi bacteria  
524 resulted in a marked increase of *unc-25::GF* expression induction in the germline. The stippled  
525 line indicates the chosen cut-off for enhancement. (D) Direct comparison of *lin-53\_CON\_rbbp-*  
526 *5* to single RNAi against *rbbp-5*, *lin-53*, and *L4440-lin-53* mixed with *L4440-rbbp-5 HT115*  
527 RNAi bacteria. CONDOR is allowing GABAergic fate reporter expression in the germline more  
528 efficiently than mixing RNAi bacteria. Statistics: unpaired t-test; \*\*\*p < 0,0001; ns = not  
529 significant; Error bars represent SEM. (E) Representative DIC / GFP signal pictures of animals  
530 with germ cells expressing the GABAergic neuron fate reporter *unc-25::GFP* upon  
531 simultaneous depletion of LIN-53 and RBBP-5 by CONDOR and broad overexpression of  
532 UNC-30. White arrow heads indicate germline with reprogrammed cells (this area is shown in  
533 magnification below). (F) Model of preventing germ cell conversion to GABAergic motor  
534 neurons by RBBP-5 and LIN-53.

535

536

537 **SUPPLEMENTAL FIGURES**

538

539 **Supplemental Figure 1: Double RNAi in *C. elegans* by mixing bacteria.** RNAi in *C. elegans*  
540 is straightforward and can be applied by feeding worms with bacteria that produce dsRNA  
541 against the target gene. The standard procedure to perform simultaneous knockdown of two  
542 genes is to mix two bacterial strains each producing specific dsRNAs. The illustration shows  
543 mixing of bacteria that produce dsRNA against *GFP* or *RFP*. The dsRNA is produced by  
544 *HT115 E.coli* bacteria that contain the RNAi plasmid L4440 plasmid. The gene of interest is  
545 cloned into L4440, which allows IPTG-induced dsRNA production.

546

547 **Supplemental Figure 2: Generating a bacterial conjugation system to combine RNAi**  
548 **plasmids.** (A) Competence for bacterial conjugation requires presence of the fertility factor,  
549 also termed F-plasmid, which contains several genes of the *tra* locus for the formation of a  
550 pilus appendage. Bacteria with the F-plasmid are denoted as F<sup>+</sup> (donor) and connect via the  
551 pilus to F<sup>-</sup> bacteria (recipient) to transfer plasmids or other genetic material containing an *oriT*  
552 to the recipient. (B) Generating the selectable 'donor' RNAi plasmid based on *L4440*, which  
553 can be transferred by conjugation, needed the addition of the *oriT* and replacement of AmpR  
554 with Chloramphenicol (CamR) resistance. This allows selection for presence of the transferred  
555 RNAi plasmid together with the resident AmpR-containing *L4440* RNAi plasmid after  
556 conjugation. We termed the newly generated donor plasmid '*LoriT*', which is basically *L4440*  
557 carrying *oriT* and CamR instead AmpR. (C) To adopt bacterial conjugation for combining RNAi  
558 plasmids, we took the F-plasmid *pRK24* (Meyer et al., 1979) and replaced the Ampicillin  
559 resistance (AmpR) of *pRK24* with Kanamycin resistance (KanR) since *L4440* used in the  
560 standard 'Ahringer' *C. elegans* RNAi library (Kamath et al., 2003) already carries AmpR. To  
561 exchange AmpR with KanR we used recombineering, as previously described (Tursun et al.,  
562 2009) due to the extensive size of *pRK24*.

563

564 **Supplemental Figure 3: Assessment of conjugation procedures for efficient transfer.**  
565 (A) Conjugation in liquid culture by combining F<sup>+</sup> donor bacteria (*SW105* or *EPI300* containing  
566 *pRK24-Kan*) and recipient *HT115*. Incubation of donor and recipient bacteria in liquid LB media  
567 containing Amp/Cam for 1h and subsequent plating on LB-Agar plates for 12h. The last step  
568 of streaking 8 colonies (if any grown) was to test for colony PCR to verify presence of donor  
569 (*LoriT-hsp-1*, CamR) and recipient (*L4440-ogt-1*, AmpR). (B and C) The two *E.coli* strains  
570 *SW105* or *EPI300* were used previously to handle large DNA constructs such as fosmids  
571 (Tursun et al., 2009) and therefore chosen as the host strains for the *pRK24-KanR* episome  
572 (F-plasmid for conjugation competence). We aimed for testing 8 colonies from each procedure  
573 of conjugation either combining a ratio of 1:1, 1:5, or 5:1 of donor D and recipient R bacteria. In

574 some cases no colonies were obtained. Obtained colonies were tested by PCR to confirm  
575 successful conjugation. The procedure as shown in (A) performed overall poorly. (D)  
576 Conjugation by combining donor and recipient bacteria in liquid LB media without antibiotics  
577 for 1h, and then with Amp/Cam for 1h with subsequent plating on LB-agar plates to select at  
578 least 8 colonies (if any grown) for examining by PCR. (E and F) As for (B and C) but with more  
579 obtained colonies. Still the yield is low and *SW105* F<sup>+</sup> donor bacteria appeared to perform very  
580 poorly. As before, we could not even obtain 8 colonies for this procedure as shown in (D) to  
581 test. (G) Conjugation on solid LB-agar without antibiotics by combining donor and recipient  
582 bacteria for 1h. Afterwards, incubation in liquid LB broth with Amp/Cam for 1h (either directly  
583 adding liquid LB, if performed in 96-well or transferring colony to culture tube) with subsequent  
584 plating on LB-Agar plates (Amp/Cam) to select at least 8 colonies for examining by PCR. (H  
585 and I) this procedure yielded the most efficient conjugations, however the use of *SW105*-  
586 based donor bacteria showed less robustness. The use of 5:1 (donor D : recipient R) yielded  
587 highly efficient conjugation with correct conjugation in all tested cases.

588

589 **Supplemental Figure 4: Synthetic lethality induced upon co-depletion of proteasomal**  
590 **subunits.** (A) We targeted the 26S-Proteasome subunit genes *rpn-10* and *rpn-12*, which  
591 cause synthetic lethality when co-depleted (Takahashi et al., 2002). (B) CONDOR-mediated  
592 simultaneous knockdown of *rpn-10* and *rpn-12* reduced survival by around 50%. In contrast,  
593 25% of the animals fed with mixed *rpn-10* and *rpn-12* RNAi bacteria died indicating that  
594 CONDOR is more efficiently depleting *rpn-10* and *rpn-12* simultaneously.

595

596

## 597 SUPPLEMENTAL TABLES

598 **Supplemental Table 1:** RNAi clones used in the study

599 **Supplemental Table 2:** Primers used in the study

600 **Supplemental Table 3:** Media recipes used in the study

601

602

603

604

605 **REFERENCES**

- 606 Beurton, F., Stempor, P., Caron, M., Appert, A., Dong, Y., Herbette, M., Huang, N., Chen, A., Cluet,  
607 D., Cout, Y., et al. (2019). Physical and functional interaction between SET1 / COMPASS complex  
608 component CFP-1 and a Sin3S HDAC complex in *C. elegans*. 1–17.
- 609 Boutros, M., and Ahringer, J. (2008). The art and design of genetic screens: RNA interference. *Nat.*  
610 *Rev. Genet.* *9*, 554–566.
- 611 Ciosk, R., DePalma, M., and Priess, J.R. (2006). Translational regulators maintain totipotency in the  
612 *Caenorhabditis elegans* germline. *Sci. (New York, NY)* *311*, 851.
- 613 Conte, D., MacNei, L.T., Walhout, A.J.M., and Mello, C.C. (2015). *RNA Interference in Caenorhabditis*  
614 *elegans* (Wiley Online Library).
- 615 Detwiler, M.R., Reuben, M., Li, X., Rogers, E., and Lin, R. (2001). Two zinc finger proteins, OMA-1  
616 and OMA-2, are redundantly required for oocyte maturation in *C. elegans*. *Dev. Cell* *1*, 187–199.
- 617 Dudley, N.R., and Goldstein, B. (2005). RNA interference in *Caenorhabditis elegans*. *Methods Mol.*  
618 *Biol. (Clifton, NJ)* *309*, 29–38.
- 619 Edelstein, A., Amodaj, N., and Hoover, K. (2010). Computer control of microscopes using  $\mu$ Manager.  
620 *Curr. Protoc.* ....
- 621 Edelstein, A.D., Tsuchida, M.A., Amodaj, N., Pinkard, H., Vale, R.D., and Stuurman, N. (2014).  
622 Advanced methods of microscope control using  $\mu$ Manager software. *J. Biol. Methods* *1*, 10–18.
- 623 Gouda, K., Matsunaga, Y., Iwasaki, T., and Kawano, T. (2010). An altered method of feeding RNAi  
624 that knocks down multiple genes simultaneously in the nematode *Caenorhabditis elegans*. *Biosci.*  
625 *Biotechnol. Biochem.* *74*, 2361–2365.
- 626 Hajduskova, M., Baytek, G., Kolundzic, E., Gosdschan, A., Kazmierczak, M., Ofenbauer, A., Del  
627 Rosal, M.L.B., Herzog, S., Ul Fatima, N., Mertins, P., et al. (2019). MRG-1/MRG15 is a barrier for  
628 germ cell to neuron reprogramming in *Caenorhabditis elegans*. *Genetics* *211*, 121–139.
- 629 Kamath, R.S., Martinez-Campos, M., Zipperlen, P., Fraser, A.G., and Ahringer, J. (2001).  
630 Effectiveness of specific RNA-mediated interference through ingested double-stranded RNA in  
631 *Caenorhabditis elegans*. *Genome Biol.* *2*, RESEARCH0002.
- 632 Kamath, R.S., Fraser, A.G., Dong, Y., Poulin, G., Durbin, R., Gotta, M., Kanapin, A., Le Bot, N.,  
633 Moreno, S., Sohrmann, M., et al. (2003). Systematic functional analysis of the *Caenorhabditis elegans*  
634 genome using RNAi. *Nature* *421*, 231–237.
- 635 Li, T., and Kelly, W.G. (2011). A Role for Set1/MLL-Related Components in Epigenetic Regulation of  
636 the *Caenorhabditis elegans* Germ Line. *PLoS Genet.* *7*, e1001349-20.
- 637 Lu, X., and Horvitz, H.R. (1998). *lin-35* and *lin-53*, two genes that antagonize a *C. elegans* Ras  
638 pathway, encode proteins similar to Rb and its binding protein RbAp48. *Cell* *95*, 981–991.
- 639 Markaki, M., and Tavernarakis, N. (2020). *Caenorhabditis elegans* as a model system for human  
640 diseases. *Curr. Opin. Biotechnol.* *1*, 118–125.
- 641 Meyer, R., Boch, G., and Shapiro, J. (1979). Transposition of DNA inserted into deletions of the Tn5  
642 kanamycin resistance element. *Mol. Gen. Genet.* *13*, 7–13.
- 643 Patel, T., Tursun, B., Rahe, D.P.D.P., and Hobert, O. (2012). Removal of Polycomb Repressive  
644 Complex 2 Makes *C. elegans* Germ Cells Susceptible to Direct Conversion into Specific Somatic Cell

645 Types. *Cell Rep.* 2, 1178–1186.  
646 Seelk, S., Adrian-Kalchhauser, I., Hargitai, B., Hajduskova, M., Gutnik, S., Tursun, B., and Ciosk, R.  
647 (2016). Increasing notch signaling antagonizes PRC2-mediated silencing to promote reprogramming of  
648 germ cells into neurons. *Elife* 5.  
649 Stiernagle, T. (2006). Maintenance of *C. elegans*. *Wormb. Online Rev. C Elegans Biol.* 1–11.  
650 Takahashi, M., Iwasaki, H., Inoue, H., and Takahashi, K. (2002). Reverse genetic analysis of the  
651 *Caenorhabditis elegans* 26S proteasome subunits by RNA interference. *Biol. Chem.*  
652 Tursun, B., Cochella, L., Carrera, I., and Hobert, O. (2009). A toolkit and robust pipeline for the  
653 generation of fosmid-based reporter genes in *C. elegans*. *PLoS One* 4, e4625.  
654 Tursun, B., Patel, T., Kratsios, P., and Hobert, O. (2011). Direct conversion of *C. elegans* germ cells  
655 into specific neuron types. *Science* 331, 304–308.  
656



## SUPPLEMENTAL MATERIAL

Kazmierczak et al.

### The CONDOR pipeline for simultaneous knockdown of multiple genes identifies RBBP-5 as a germ cell reprogramming barrier in *C. elegans*

Marlon Kazmierczak<sup>1,2</sup>, Carlota Farré i Díaz<sup>1,2</sup>, Andreas Ofenbauer<sup>1,2</sup>, Baris Tursun<sup>1,2#</sup>

#### Affiliations:

<sup>1</sup>Berlin Institute of Medical Systems Biology,

<sup>2</sup>Max Delbrück Center for Molecular Medicine in the Helmholtz Association, 13125 Berlin, Germany

#### #Correspondence to:

baris.tursun@mdc-berlin.de (BT)

## SUPPLEMENTAL FIGURES

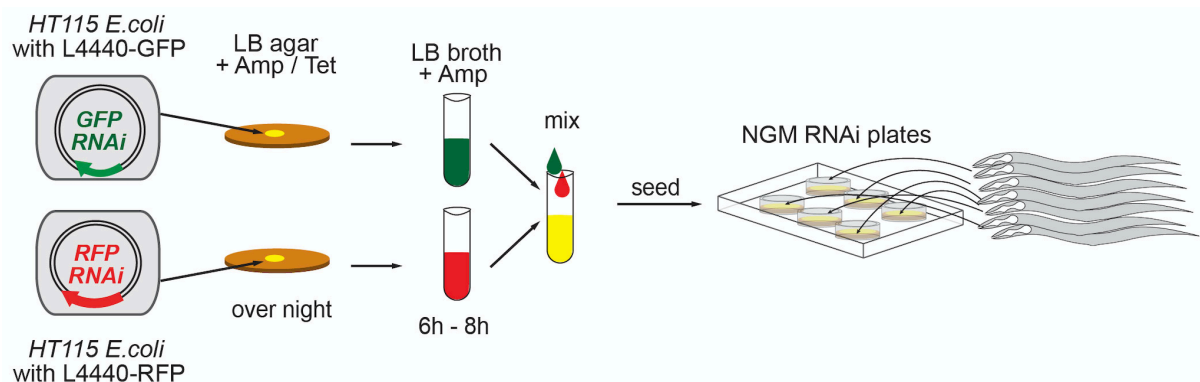

**Supplemental Figure 1: Double RNAi in *C. elegans* by mixing bacteria.** RNAi in *C. elegans* is straightforward and can be applied by feeding worms with bacteria that produce dsRNA against the target gene. The standard procedure to perform simultaneous knockdown of two genes is to mix two bacterial strains each producing specific dsRNAs. The illustration shows mixing of bacteria that produce dsRNA against *GFP* or *RFP*. The dsRNA is produced by *HT115 E. coli* bacteria that contain the RNAi plasmid L4440 plasmid. The gene of interest is cloned into L4440, which allows IPTG-induced dsRNA production.

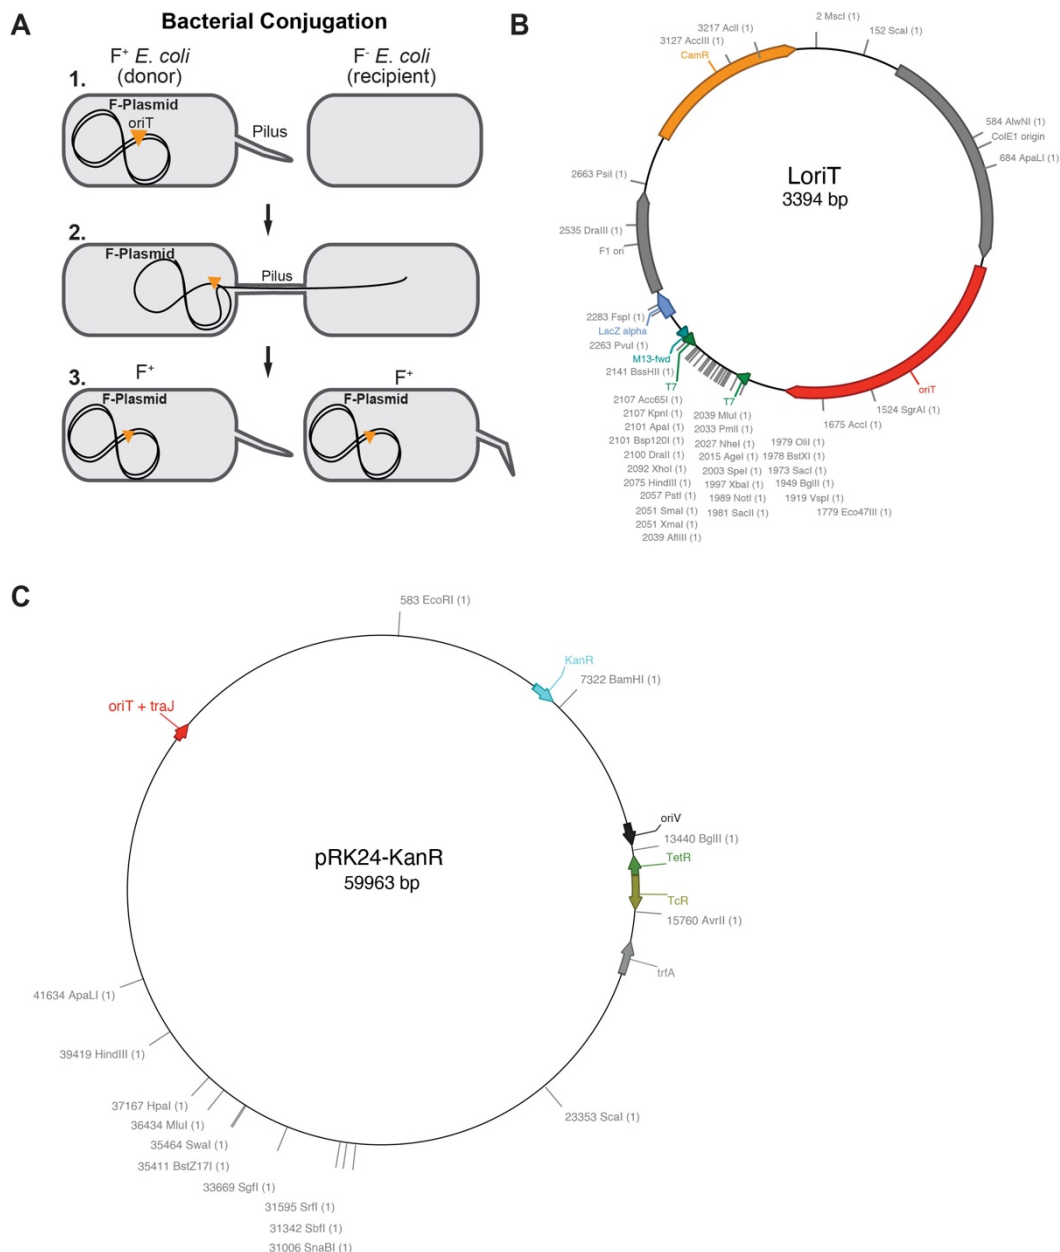

**Supplemental Figure 2: Generating a bacterial conjugation system to combine RNAi plasmids.**

(A) Competence for bacterial conjugation requires presence of the fertility factor, also termed F-plasmid, which contains several genes of the *tra* locus for the formation of a pilus appendage. Bacteria with the F-plasmid are denoted as F<sup>+</sup> (donor) connect via the pilus to F<sup>-</sup> bacteria (recipient) and transfer plasmids or other genetic material containing an *oriT* to the recipient. (B) Generating the selectable ‘donor’ RNAi plasmid based on *L4440*, which can be transferred by conjugation, needed the addition of the *oriT* and replacement of AmpR with Chloramphenicol (CamR) resistance. This allows selection for presence of the transferred RNAi plasmid together with the resident AmpR-containing *L4440* RNAi plasmid after conjugation. We termed the newly generated donor plasmid ‘*LoriT*’, which is basically *L4440* carrying *oriT* and CamR instead AmpR. (C) To adopt bacterial conjugation for combining RNAi plasmids, we made the F-plasmid *pRK24* (Meyer et al., 1979) we replaced the Ampicillin resistance (AmpR) of *pRK24* with Kanamycin resistance (KanR) since *L4440* used in the standard ‘Ahringer’ *C. elegans* RNAi library (Kamath et al., 2003) already carries AmpR. To exchange AmpR with KanR we used recombineering, as previously described (Tursun et al., 2009) due to the extensive size of *pRK24*.

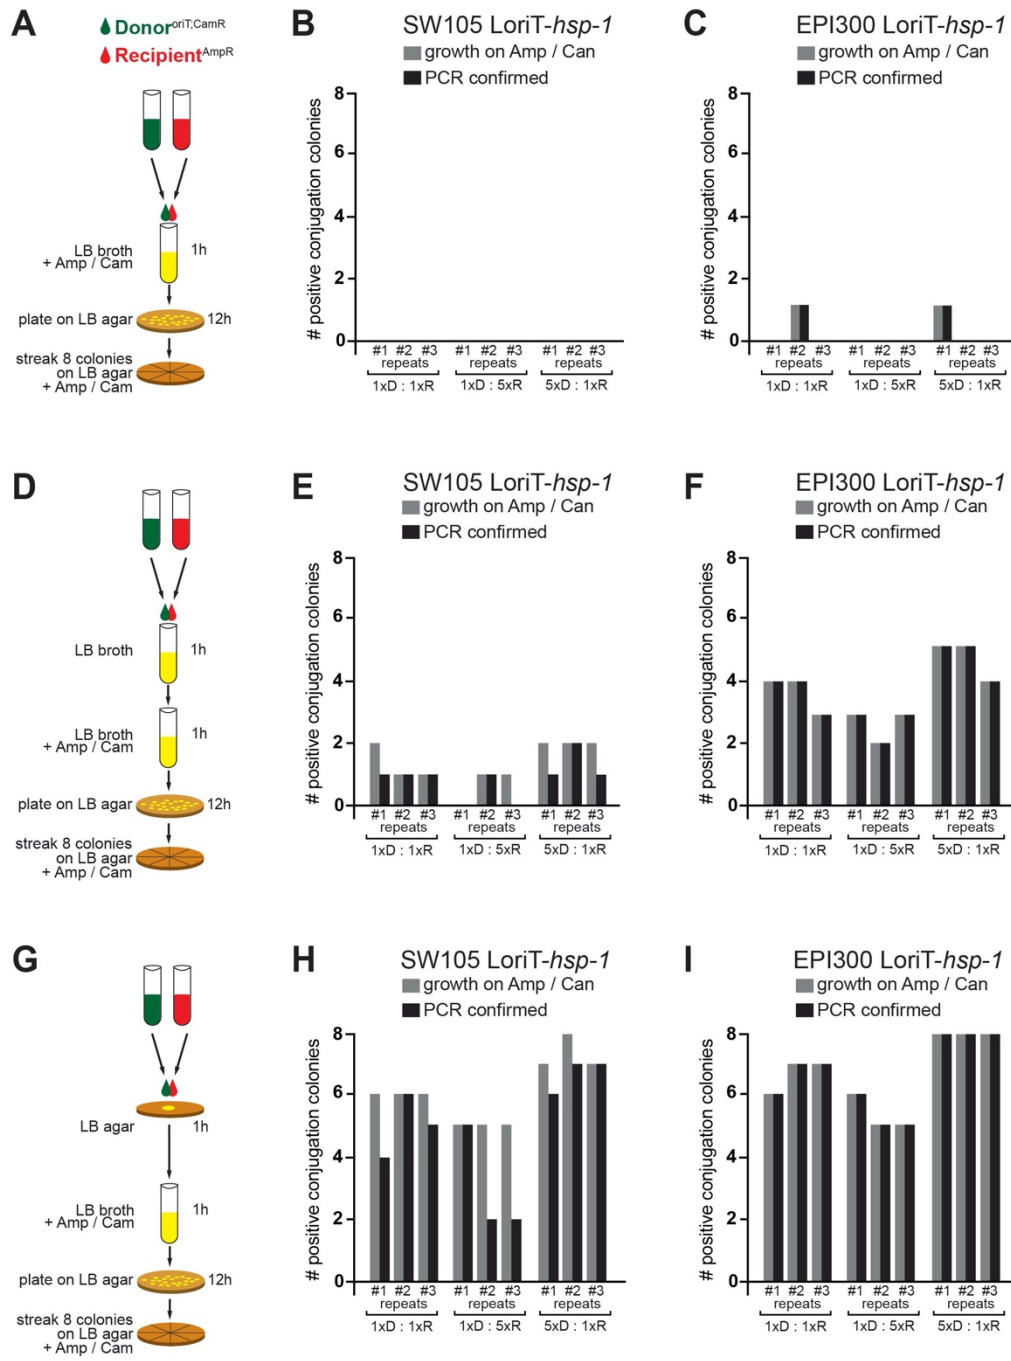

**Supplemental Figure 3: Assessment of conjugation procedures for efficient transfer. (A)**

Conjugation in liquid culture by combining F<sup>+</sup> donor bacteria (*SW105* or *EPI300* containing *pRK24-Kan*) and recipient *HT115*. Incubation of donor and recipient bacteria in liquid LB media containing Amp/Cam for 1h and subsequent plating on LB-Agar plates for 12h. The last step of streaking 8 colonies (if any grown) was to test for colony PCR to verify presence of donor (*LoriT-hsp-1*, CamR) and recipient (*L4440-ogt-1*, AmpR). (B and C) The two *E. coli* strains *SW105* or *EPI300* were used previously to handle large DNA constructs such as fosmids (Tursun et al., 2009) and therefore chosen as the host strains for the *pRK24-KanR* episome (F-plasmid for conjugation competence). We aimed for testing 8 colonies from each procedure of conjugation either combining a ratio of 1:1, 1:5, or 5:1 of donor D and recipient R

bacteria. In some cases no colonies were obtained. Obtained colonies were tested by PCR to confirm successful conjugation. The procedure as shown in (A) performed overall poorly. (D) Conjugation by combining donor and recipient bacteria in liquid LB media without antibiotics for 1h, and then with Amp/Cam for 1h with subsequent plating on LB-agar plates to select at least 8 colonies (if any grown) for examining by PCR. (E and F) As for (B and C) but with more obtained colonies. Still the yield is low and *SW105* F<sup>+</sup> donor bacteria appeared to perform very poorly. As before, we could not even obtain 8 colonies for this procedure as shown in (D) to test. (G) Conjugation on solid LB-agar without antibiotics by combining donor and recipient bacteria for 1h. Afterwards, incubation in liquid LB broth with Amp/Cam for 1h (either directly adding liquid LB, if performed in 96-well or transferring colony to culture tube) with subsequent plating on LB-Agar plates (Amp/Cam) to select at least 8 colonies for examining by PCR. (H and I) this procedure yielded the most efficient conjugations, however the use of *SW105*-based donor bacteria showed less robustness. The use of 5:1 (donor D : recipient R) yielded highly efficient conjugation with correct conjugation in all tested cases.

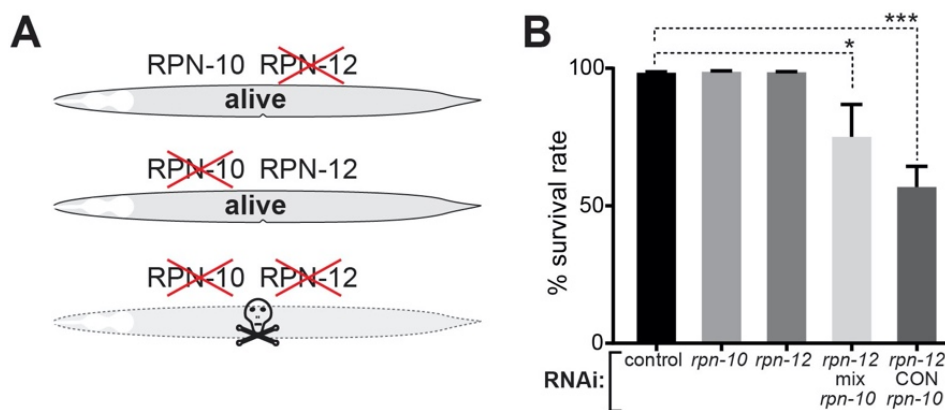

**Supplemental Figure 4: Synthetic lethality induced upon co-depletion of proteasomal subunits.**

(A) We targeted the 26S-Proteasome subunit genes *rpn-10* and *rpn-12*, which cause synthetic lethality when co-depleted (Takahashi et al., 2002). (B) CONDOR-mediated simultaneous knockdown of *rpn-10* and *rpn-12* reduced survival by around 50%. In contrast, 25% of the animals fed with mixed *rpn-10* and *rpn-12* RNAi bacteria died indicating that CONDOR is more efficiently depleting *rpn-10* and *rpn-12* simultaneously.

## SUPPLEMENTAL TABLES

**Supplemental Table 1: RNAi clones used in the study**

| Target Gene   | Function                                                                           | Source                                           |
|---------------|------------------------------------------------------------------------------------|--------------------------------------------------|
| <i>lin-53</i> | histone-chaperone LIN-53 ortholog of human RBBP4                                   | Chromatin RNAi library; Hajduskjova et al., 2019 |
| <i>rpn-10</i> | proteasome subunit                                                                 | Chromatin RNAi library; Hajduskjova et al., 2019 |
| <i>rpn-12</i> | proteasome subunit                                                                 | Chromatin RNAi library; Hajduskjova et al., 2019 |
| <i>rbbp-5</i> | Retino blastoma protein binding Protein; Set1/MLL methyltransferase complex member | Chromatin RNAi library; Hajduskjova et al., 2019 |
| <i>oma-2</i>  | Oocyte Maturation defective; Zn-Finger                                             | Ahringer RNAi library; Kamath et al., 2003       |
| <i>gld-1</i>  | Translational regular; ortholog of human QKI - KH domain containing RNA binding    | Ahringer RNAi library; Kamath et al., 2003       |
| <i>mex-3</i>  | ortholog of human MEX3A RNA binding family member                                  | Ahringer RNAi library; Kamath et al., 2003       |
| <i>ogt-1</i>  | ortholog of human OGT (O-linked N-acetylglucosamine (GlcNAc) transferase           | Chromatin RNAi library; Hajduskjova et al., 2019 |

RNAi clones used for CONDOR screen in combination with *LoriT-lin-53* (Figure 6) were derived from the Chromatin RNAi library described in Hajduskova et al., 2019 (see Table S1 from Hajduskova et al., 2019; Genetics; doi: 10.1534/genetics.118.301674).

**Supplemental Table 2: Primers used in the study**

*cloning rpn-10*

oMK03 FWD tgg atc cac cgg ttc cat ggT GGA ATT CTG TCA ATG GCA AAG

oMK04 REV gg atc cac gcg tca cgt ggG AGC TCC ATC CAC ATC CAT TTG

*cloning rpn-12*

oMK05 FWD tgg atc cac cgg ttc cat ggA AAT CTT CTG GCT GTG TG

oMK06 REV ggg atc cac gcg tca cgt ggT GCT AAA ACA ATG CAT CG

*cloning oma-1*

oMK33 FWD tgg atc cac cgg ttc cat ggC CGA ATG CAG AAA CCA GAA TC

oMK34 REV ggg atc cac gcg tca cgt ggG GCC AAG TTT CTA TGG GAC

*cloning oma-2*

oMK35 FWD tgg atc cac cgg ttc cat ggC CGA ATG CAG AAA CCA GAA TC

oMK36 REV ggg atc cac gcg tca cgt ggA AAC GGA CTG ATT GGA CG

*cloning Cam*

oBT1135 FWD taa act tgg tct gac agT TAC GCC CCG CCC TGC CA

oBT1137 REV ttg ttt att ttt cta aat aca ACG TAA GAG GTT CCA ACT TTC ACC ATA ATG AAA TAA GAT CAC

*cloning Kan*

oBT1263 FWD ttc gag ctc cac ggc CCT GTG ACG GAA GAT CAC TTC

oBT1264 REV gag ctc aaa atc ccg cAG CGC TTT TCC GCT GCA T

oBT1414 FWD GAA GTT TTA AAT CAA TCT AAA GTA TAT ATG AGT AA ACT TGG TCT GAC AGt tat tag aaa  
aat tca tcc agc aga cg

oBT1415 REV TGT ATT TAG AAA AAT AAA CAA ATA GG GGT TCC GCG CAC ATT TCC CCG AAA AGc gcg  
gaa ccc cta ttt gt tta ttt ttc

*cloning oriT*

oBT1285 FWD cca ccg gtt cca tgg GGC GCT CGG TCT TGC CTT

oBT1286 REV cca cgc gtc acg tgg AGC GCT TTT CCG CTG CAT AAC

*cloning lin-53*

oBT2241 FWD tgg atc cac cgg ttc cat ggC TCG TAA TGA CAC ATG CG

oBT2242 REV tga tat cga att cct gca gcG AGA AAT CGC TGA TCT TGG

oBT2391 FWD tgg atc cac cgg ttc cat ggC TCG TAA TGA CAC ATG CG

oBT2392 REV tga tat cga att cct gca gcG AGA AAT CGC TGA TCT TG

### Supplemental Table 3: Media recipes used in the study

LB (Luria Bertani), (liquid medium) (1L),  
25 g LB broth (Carl Roth GmbH + Co. KG), ddH<sub>2</sub>O

LB/Amp medium (1 L)  
25 g LB broth (Carl Roth GmbH + Co. KG), ddH<sub>2</sub>O, Ampicillin (100 µg/ml final concentration)

LB/Amp plates (1 L)  
25 g LB broth (Carl Roth GmbH + Co. KG), 15 g Agar (Carl Roth GmbH + Co. KG), ddH<sub>2</sub>O, Ampicillin (100 µg/ml final concentration)

LB/Amp+Tet plates (1 L)  
25 g LB broth (Carl Roth GmbH + Co. KG), 15 g Agar (Carl Roth GmbH + Co. KG), ddH<sub>2</sub>O, Ampicillin (100 µg/ml final concentration), Tetracycline (12.5 µg/ml final concentration)

LB/Amp+Tet+Cam plates  
25 g LB broth (Carl Roth GmbH + Co. KG), 15 g Agar (Carl Roth GmbH + Co. KG), ddH<sub>2</sub>O, Ampicillin (100 µg/ml final concentration)

LB/Amp+Tet plates (1 L)  
25 g LB broth (Carl Roth GmbH + Co. KG), 15 g Agar (Carl Roth GmbH + Co. KG), ddH<sub>2</sub>O, Ampicillin (100 µg/ml final concentration), Tetracycline (12.5 µg/ml final concentration), Chloramphenicol (20 µg/mL final concentration)

LB/Cam plates  
25 g LB broth (Carl Roth GmbH + Co. KG), 15 g Agar (Carl Roth GmbH + Co. KG), ddH<sub>2</sub>O, Chloramphenicol (20 µg/mL final concentration)

NGM (1 L)  
3 g NaCl, 20 g Agar (CarlRothGmbH+Co.KG), 2,5g Peptone (Becton, Dickinson and Company), ddH<sub>2</sub>O, after autoclaving add: 1 ml Cholesterol (5 mg/ml in 95% EtOH stock solution), 1 ml 1 M MgSO<sub>4</sub>, 1 ml 1 M CaCl<sub>2</sub>, 25 ml 1 M K<sub>2</sub>PO<sub>4</sub>, 1 ml fungizone (Amphotericin B 2.5 mg/ml stock)

NGM for RNAi (1 L)  
3 g NaCl, 20 g Agar (CarlRothGmbH+Co.KG), 2,5g Peptone (Becton, Dickinson and Company), ddH<sub>2</sub>O after autoclaving add: 1 ml Cholesterol (5 mg/ml in 95% EtOH), 1 ml 1 M MgSO<sub>4</sub>, 1 ml 1 M CaCl<sub>2</sub>, 25 ml 1 M K<sub>2</sub>PO<sub>4</sub>, 1 ml fungizone (Amphotericin B 2.5 mg/ml stock), add 50 µg/ml ampicillin and 1 mM (final) IPTG
